# Supplementary material
Source: publisher figshare collection journal article supplement (https://future-science-group.figshare.com/articles/dataset/_/22146761)
Supplement: Supplementary file 1 [file 1]

## Sheet: Table S2
gene	conMean	treatMean	logFC	pValue	fdr
TIGAR	0.74246	2.30373	1.56127	3.05416e-45	1.3959e-44
LINC01224	0.0489598	2.08314	2.03418	1.61666e-47	1.31451e-46
DACH1	0.435523	1.92885	1.49333	6.7073e-25	1.17119e-24
AP000892.3	2.78563	0.652992	-2.13263	3.66386e-44	1.46389e-43
PFN2	4.57505	5.70757	1.13252	9.06981e-29	1.74342e-28
RMND5A	2.18439	3.79218	1.60779	2.9443e-47	2.14603e-46
RAD23A	5.15773	6.22553	1.0678	2.54407e-42	8.66817e-42
TUBB4A	0.627613	2.32928	1.70166	8.7223e-22	1.42275e-21
COX10	1.63385	2.76539	1.13155	1.33614e-47	1.12995e-46
MFSD3	2.21636	4.73752	2.52116	6.52844e-48	6.75003e-47
AL671277.1	1.01357	2.68045	1.66688	1.08904e-31	2.27237e-31
IL32	3.06644	4.2301	1.16366	1.43005e-16	2.09203e-16
RPS4XP3	0.357729	1.81912	1.46139	4.42695e-46	2.33859e-45
NUCB2	4.48206	2.77145	-1.71061	4.54543e-45	2.02184e-44
SPATA2	1.60854	3.05652	1.44798	3.61848e-48	4.85777e-47
OTUD1	2.34439	3.57681	1.23243	1.80335e-39	5.14029e-39
HOOK1	0.492852	2.41742	1.92457	7.8363e-46	3.94999e-45
SLC45A4	1.49751	3.0752	1.57769	8.55257e-45	3.67737e-44
ESM1	0.418836	2.03897	1.62014	1.59123e-42	5.49711e-42
AC011481.1	3.47239	4.83419	1.3618	5.01907e-43	1.81137e-42
FOXP1	3.55026	2.1311	-1.41917	2.14905e-46	1.22514e-45
MAF1	5.6286	6.8168	1.1882	1.72206e-43	6.44654e-43
NPHP3	4.40046	0.949631	-3.45083	2.05471e-48	4.59288e-47
MITD1	3.75586	2.48239	-1.27347	5.02043e-47	3.37839e-46
DESI2	2.42351	3.93826	1.51475	1.3883e-47	1.16448e-46
PSORS1C3	0.141244	1.86606	1.72482	9.13584e-36	2.2012e-35
NLGN2	4.88888	3.48313	-1.40576	1.00325e-39	2.89567e-39
PKMYT1	0.471537	2.52598	2.05444	2.79843e-47	2.05667e-46
PHF1	6.61469	4.0822	-2.53249	4.79922e-48	5.63289e-47
IGHV1-24	0.368496	2.00085	1.63235	3.70263e-15	5.27136e-15
ANKMY1	2.55691	1.21536	-1.34155	6.04625e-45	2.64315e-44
AC009237.15	0.427375	1.7587	1.33133	2.90554e-45	1.33336e-44
FBXO45	1.31228	2.32015	1.00787	3.51374e-41	1.10703e-40
HLA-DRB1	3.56392	7.96365	4.39973	3.77115e-45	1.69688e-44
EFCAB1	2.50731	0.609438	-1.89788	3.31849e-36	8.16311e-36
KLK8	0.330738	4.75186	4.42112	2.50125e-46	1.40057e-45
RBM15B	2.63452	4.03741	1.4029	1.47979e-47	1.22579e-46
NCAPG	0.280264	2.25908	1.97881	7.05011e-48	7.12257e-47
AC012499.1	0.0355503	1.11379	1.07824	3.53738e-39	9.94418e-39
KLK10	3.22046	5.44911	2.22865	3.74543e-28	7.07482e-28
MIR4292	0	2.17193	2.17193	7.40376e-47	4.74653e-46
PCMTD1	4.29802	3.24092	-1.0571	1.87364e-37	4.84891e-37
AC112907.2	0.0204728	1.73101	1.71054	3.3463e-48	4.76232e-47
FRMD8	2.66866	3.99288	1.32422	2.10222e-45	9.8558e-45
HELZ2	1.84015	3.1516	1.31145	6.7018e-34	1.50632e-33
MINDY4	2.49266	0.44896	-2.0437	2.08138e-48	4.59288e-47
ZNF767P	3.56951	2.19634	-1.37317	9.76489e-44	3.73764e-43
SNORD99	0	2.10777	2.10777	8.71586e-48	8.22407e-47
SLC2A1	3.14548	6.14345	2.99796	1.23152e-43	4.67455e-43
LEMD1-AS1	2.52915	0.483478	-2.04567	5.0152e-40	1.472e-39
AC104825.1	2.64845	1.26755	-1.3809	8.43079e-42	2.76595e-41
AC139768.2	1.94919	0.933272	-1.01592	2.7393e-41	8.69528e-41
RPRM	2.57328	1.21026	-1.36302	5.815e-21	9.31834e-21
TNNT1	0.983437	4.77445	3.79101	1.09492e-42	3.83675e-42
AC009220.1	0.277945	1.485	1.20706	1.59604e-40	4.83654e-40
MT-ND1	10.2476	12.5063	2.25867	1.65933e-41	5.34664e-41
CAMK1	4.38479	1.62936	-2.75542	2.59046e-48	4.59288e-47
ADIRF-AS1	3.67936	1.44297	-2.23639	2.41106e-45	1.12044e-44
MIR3936HG	2.65385	0.828777	-1.82508	4.67797e-48	5.55348e-47
KCNE4	2.25014	0.985361	-1.26478	1.59678e-24	2.762e-24
PHYKPL	5.2708	2.57153	-2.69926	2.05472e-48	4.59288e-47
NME1-NME2	1.83677	0.633527	-1.20324	1.30316e-39	3.7392e-39
PHLDA2	1.02817	4.35484	3.32667	4.42209e-47	3.03508e-46
EVPL	0.367351	3.13925	2.7719	8.13638e-46	4.08777e-45
SPON1-AS1	0.227208	1.42245	1.19524	5.82912e-36	1.41679e-35
IL27RA	0.698962	2.72709	2.02813	1.0296e-44	4.38042e-44
CENPH	1.42255	2.7524	1.32985	3.91613e-45	1.75829e-44
EPB41L2	5.46851	2.89713	-2.57137	3.51081e-46	1.90007e-45
LDHA	6.15422	7.37794	1.22372	2.04128e-26	3.69747e-26
PDE5A	2.0742	0.76721	-1.30699	1.86749e-45	8.82405e-45
ATP6AP2	4.7991	5.93138	1.13228	6.91137e-40	2.0132e-39
ATP23	1.64072	2.92414	1.28342	9.94992e-47	6.13348e-46
MTND4P24	0.0152495	1.86311	1.84786	2.13356e-48	4.59288e-47
HEY2	1.79351	3.44069	1.64718	7.09142e-29	1.36728e-28
ACOX2	3.64563	1.62796	-2.01767	3.01644e-45	1.38035e-44
INTS13	2.30077	3.67332	1.37255	2.37682e-46	1.33741e-45
PROSER2	1.22041	3.04916	1.82875	1.33462e-44	5.6112e-44
HNRNPA2B1	8.08249	6.18149	-1.901	3.09926e-48	4.67701e-47
MIR100HG	5.60823	2.48601	-3.12222	6.51292e-45	2.83514e-44
CYP2E1	1.68386	0.330055	-1.3538	5.62771e-47	3.72355e-46
IGLC7	0.32435	1.34936	1.02501	5.49332e-12	7.32509e-12
RPS13P2	1.24297	3.08601	1.84304	1.83292e-45	8.67173e-45
PTCD3	4.68268	3.04202	-1.64066	4.27581e-48	5.27532e-47
STARD5	2.04975	0.361142	-1.68861	2.05476e-48	4.59288e-47
SRRM1	6.26421	3.85958	-2.40463	5.52628e-48	6.10111e-47
LSM4	4.55694	5.96738	1.41043	2.81664e-45	1.29535e-44
DDX3X	5.72266	4.60972	-1.11293	1.75244e-42	6.03204e-42
RPL41	11.637	9.51186	-2.12511	9.45479e-48	8.68645e-47
TP73-AS1	3.72319	2.22612	-1.49707	3.94424e-47	2.75301e-46
MZT2A	5.63319	3.71347	-1.91972	9.76276e-47	6.03803e-46
EXOSC7	4.08334	2.73518	-1.34815	4.16762e-48	5.22132e-47
IGHGP	0.234523	1.30788	1.07336	4.80157e-13	6.55366e-13
RECQL5	3.92759	2.27983	-1.64776	5.6995e-47	3.76305e-46
ZNF35	1.11014	2.33844	1.2283	7.51623e-48	7.40046e-47
OGDHL	0.956282	2.58804	1.63176	8.53356e-37	2.1486e-36
FAM86C1	1.2513	2.39591	1.14461	2.08053e-44	8.57269e-44
AC136632.1	2.30099	3.77819	1.4772	6.20454e-43	2.22065e-42
PPP4C	4.20845	6.02096	1.81251	2.3667e-48	4.59288e-47
AC004233.3	0.0646603	2.01155	1.94689	3.5175e-48	4.81945e-47
NCEH1	0.764221	2.99901	2.23478	1.03492e-47	9.27532e-47
ZFYVE28	2.14139	0.904223	-1.23716	3.45854e-45	1.56686e-44
RCAN3	0.464544	2.41775	1.9532	1.7028e-47	1.37311e-46
ZNF451	2.90162	1.56564	-1.33599	4.38705e-48	5.34563e-47
LINC00621	0.187025	1.46863	1.28161	2.44151e-35	5.79025e-35
RNF24	1.63855	3.16536	1.5268	4.27192e-45	1.90834e-44
LEMD2	4.77436	3.69635	-1.07801	3.54544e-45	1.60122e-44
IGLC3	2.71899	4.96062	2.24163	1.25427e-11	1.66083e-11
VPS18	1.98499	3.28719	1.3022	1.6797e-45	7.99157e-45
UQCRB	7.44261	4.51571	-2.92691	2.13535e-48	4.59288e-47
DIPK1B	2.47555	3.94908	1.47353	7.35732e-36	1.78055e-35
PRRT1	4.50724	1.51123	-2.99601	1.26967e-47	1.08656e-46
RNF5	4.56257	6.93625	2.37368	2.05402e-48	4.59288e-47
NPIPB14P	2.71173	0.188773	-2.52296	2.05319e-48	4.59288e-47
PCBP3	1.54002	0.358449	-1.18157	6.88111e-42	2.272e-41
MPLKIP	1.2845	2.4907	1.2062	1.13177e-47	9.93718e-47
PEMT	3.7666	4.78681	1.0202	1.36567e-37	3.55778e-37
WNK4	1.71374	0.304203	-1.40954	1.68217e-39	4.80158e-39
SNORA11F	0.212983	1.39002	1.17703	1.6827e-32	3.60545e-32
EEF1A1P11	0.779338	2.4808	1.70146	1.83288e-45	8.67173e-45
AC087481.3	2.47159	1.15726	-1.31434	4.16703e-45	1.86466e-44
DOCK10	3.13798	0.789008	-2.34897	7.71125e-48	7.50095e-47
RMI2	1.35829	3.17142	1.81312	8.99232e-47	5.62712e-46
USP18	1.19499	3.51413	2.31914	5.05357e-46	2.64108e-45
SOSTDC1	0.404673	1.68466	1.27998	4.02087e-14	5.60718e-14
Z97353.1	0.208767	1.71424	1.50548	3.4528e-48	4.78118e-47
KCNJ11	0.355112	1.36599	1.01088	2.51422e-42	8.56939e-42
PLEKHM1P1	2.64879	1.59083	-1.05795	5.42245e-38	1.44435e-37
CAPN3	3.40694	0.172981	-3.23396	2.05463e-48	4.59288e-47
POGK	2.62425	3.90529	1.28104	7.04994e-48	7.12257e-47
DHX15	5.17646	4.08121	-1.09525	1.24477e-45	6.05408e-45
AC091390.3	0.0440181	1.37425	1.33023	2.43095e-48	4.59288e-47
RPF1	3.23568	4.57382	1.33814	3.42966e-47	2.44253e-46
RAD54L	0.512371	2.38285	1.87047	3.34377e-47	2.39128e-46
CHORDC1	3.50552	1.73927	-1.76625	6.61286e-48	6.81048e-47
OGN	4.57458	1.28644	-3.28814	7.28081e-44	2.81813e-43
AL023803.1	0.141354	1.32651	1.18516	2.06605e-38	5.60285e-38
SNORD63	0	1.40904	1.40904	6.35549e-44	2.47182e-43
AKR1C2	2.47164	0.287242	-2.1844	1.58784e-46	9.35038e-46
LSM2	4.22197	6.11705	1.89508	9.76856e-48	8.9134e-47
NIF3L1	2.58354	4.40413	1.82059	2.46042e-48	4.59288e-47
MRPS25	4.53976	3.2249	-1.31486	2.29597e-44	9.40199e-44
ZCCHC17	3.16671	4.63507	1.46836	2.24838e-48	4.59288e-47
MZT1	1.56047	3.79899	2.23852	2.05473e-48	4.59288e-47
PCDHGA2	1.68074	0.494756	-1.18598	5.39268e-37	1.36854e-36
CREM	4.43583	2.45493	-1.98089	5.11729e-46	2.67288e-45
AC139768.1	3.86904	1.16522	-2.70383	2.1083e-48	4.59288e-47
CALML5	0.471675	1.6047	1.13302	3.56292e-09	4.49423e-09
BIN3	3.30338	1.7602	-1.54318	3.35017e-48	4.76232e-47
RTN2	1.08956	2.33659	1.24704	5.35212e-32	1.12615e-31
LYZ	1.74083	4.66694	2.92611	3.58622e-36	8.8087e-36
DDX21	3.059	4.68717	1.62817	6.27948e-43	2.2456e-42
C21orf91	1.52172	2.61113	1.08941	5.2368e-43	1.88597e-42
STOX1	0.518207	1.81442	1.29622	4.41941e-43	1.60619e-42
NR2F1	5.05839	2.33147	-2.72692	2.42676e-44	9.89397e-44
LINC01145	2.24774	0.889398	-1.35834	1.09858e-45	5.38258e-45
ZZEF1	3.16161	1.81611	-1.3455	5.34923e-47	3.56341e-46
CDK5RAP2	3.71879	2.70797	-1.01082	1.49417e-41	4.83121e-41
CCDC167	2.1537	5.66418	3.51048	2.05454e-48	4.59288e-47
ICA1	1.37294	2.51469	1.14175	4.18368e-33	9.14239e-33
OSBPL5	3.22959	1.89062	-1.33897	2.56582e-45	1.18735e-44
FGFR4	3.76139	1.66198	-2.09941	3.21656e-39	9.05051e-39
MBOAT1	2.59674	4.0384	1.44166	1.62985e-36	4.05427e-36
CRB3	0.40475	3.92319	3.51844	5.92022e-47	3.88545e-46
MCF2L-AS1	0.90762	2.16217	1.25455	3.01714e-17	4.4709e-17
AL138721.1	0.339871	1.62458	1.28471	6.21701e-34	1.39933e-33
ECHDC3	2.29867	3.68236	1.38369	5.64548e-34	1.27244e-33
DDR1	4.32543	5.75435	1.42892	2.15914e-40	6.47951e-40
CDH6	0.58982	3.44903	2.85921	1.89783e-40	5.72029e-40
SPI1	1.65453	4.06476	2.41023	7.21816e-42	2.37988e-41
NBPF9	2.75573	0.873431	-1.8823	3.61864e-48	4.85777e-47
SCPEP1	4.91034	3.82586	-1.08448	4.106e-26	7.3777e-26
NRK	3.3452	0.440358	-2.90484	1.03347e-46	6.34122e-46
SLPI	1.64482	10.1797	8.53488	1.02314e-47	9.20083e-47
ITGB3BP	3.22089	2.07107	-1.14982	1.55528e-37	4.03682e-37
TOR4A	1.7237	2.84443	1.12073	5.21017e-26	9.33009e-26
HAUS7	3.43252	0.623772	-2.80875	2.05471e-48	4.59288e-47
PDCD4	6.40291	4.20771	-2.1952	3.83364e-46	2.05675e-45
FP236383.3	8.08179	1.65651	-6.42527	2.307e-48	4.59288e-47
CHD1	4.22788	1.78538	-2.4425	2.08139e-48	4.59288e-47
WDR90	4.76277	2.19355	-2.56922	4.27611e-48	5.27532e-47
FCGRT	6.58323	4.95099	-1.63224	9.92019e-45	4.23447e-44
IGDCC4	2.86104	0.732141	-2.1289	1.17275e-46	7.10416e-46
FTH1P7	1.44968	3.52458	2.0749	5.38065e-46	2.80023e-45
ZNF622	2.91684	4.25832	1.34148	1.02171e-47	9.19275e-47
MYSM1	3.11051	1.95436	-1.15615	4.71791e-45	2.09202e-44
ANXA3	1.2817	3.54564	2.26393	4.09207e-44	1.62728e-43
AC009005.1	0.752447	1.8985	1.14605	1.23663e-25	2.19356e-25
PHACTR3	2.00466	0.218041	-1.78662	2.69348e-47	1.99463e-46
NPIPB3	5.05588	0.794481	-4.2614	2.05469e-48	4.59288e-47
SAYSD1	2.15365	3.1882	1.03455	4.69571e-43	1.70162e-42
RPL38	9.40494	7.58767	-1.81727	8.37496e-47	5.27452e-46
AC011933.1	0.0496411	1.89083	1.84119	1.45029e-48	4.59288e-47
PRRT2	5.51509	0.920037	-4.59506	2.5247e-48	4.59288e-47
RPS10-NUDT3	1.97073	0.162954	-1.80778	4.71829e-46	2.48121e-45
TONSL	1.14766	3.28361	2.13595	6.36349e-48	6.64953e-47
ZNF664	3.60682	5.10145	1.49464	1.76902e-47	1.41861e-46
TYK2	5.75284	3.83494	-1.91791	2.12206e-46	1.21243e-45
ADCY10P1	2.10948	0.634701	-1.47478	3.03336e-43	1.11575e-42
FAHD2B	3.91118	2.20416	-1.70702	2.53416e-45	1.17442e-44
PSMB5	4.69581	6.18882	1.49301	7.34222e-47	4.71776e-46
LRIG1	3.25532	4.59147	1.33615	1.03068e-28	1.97758e-28
IGHV3-21	0.612155	3.16371	2.55156	2.00857e-20	3.17539e-20
FXYD6	7.0977	2.57274	-4.52496	4.38666e-48	5.34563e-47
RPS26P31	0.202226	1.59404	1.39181	2.26939e-45	1.05831e-44
CXCL8	0.915853	2.686	1.77015	3.46976e-27	6.39277e-27
FAM124A	0.558106	1.92422	1.36611	3.95971e-39	1.11129e-38
ANTXR2	4.92501	1.23001	-3.695	2.42909e-48	4.59288e-47
MICOS10	5.09618	2.90715	-2.18902	2.3673e-48	4.59288e-47
UBE2J1	2.92127	4.3821	1.46082	1.22184e-47	1.05345e-46
TNFAIP8L3	2.48554	0.832942	-1.6526	1.03101e-42	3.61963e-42
SPDEF	0.202148	3.21196	3.00982	5.98443e-44	2.33261e-43
KIAA1324	0.331527	1.56989	1.23837	4.40579e-13	6.017e-13
RPL23AP82	2.8726	1.15299	-1.71962	9.34279e-48	8.61876e-47
HIST1H3F	0.0299844	1.4272	1.39721	1.10546e-46	6.74049e-46
MZT2B	6.87198	5.21023	-1.66174	2.69561e-46	1.49604e-45
VCAM1	3.30653	2.01361	-1.29292	1.52637e-20	2.42071e-20
ULK1	4.91098	3.51627	-1.39471	1.24302e-40	3.79276e-40
GNG4	3.50099	0.793349	-2.70764	1.12192e-42	3.92695e-42
HOXB-AS3	0.143791	1.19269	1.0489	2.2842e-25	4.02181e-25
EP400	3.78796	2.28425	-1.50371	5.21516e-47	3.4804e-46
ADAMTSL4	4.10012	1.47156	-2.62856	2.79961e-46	1.54711e-45
C19orf73	0.247483	1.46885	1.22137	3.75783e-45	1.6913e-44
SORBS2	3.06069	1.05009	-2.0106	2.35173e-45	1.09479e-44
TRMT44	3.38366	1.50973	-1.87393	5.67019e-48	6.19341e-47
CFB	2.95793	4.08205	1.12412	1.85537e-14	2.60611e-14
CDO1	2.69577	0.673218	-2.02255	6.40449e-42	2.12028e-41
TNPO3	2.83626	4.00003	1.16376	3.05405e-45	1.3959e-44
AC004057.1	7.86104	2.26907	-5.59197	2.36703e-48	4.59288e-47
CPT2	1.91575	3.33241	1.41666	2.83499e-46	1.56482e-45
MAFK	3.44634	2.37759	-1.06875	7.7673e-30	1.53765e-29
RPS24	11.3309	7.81859	-3.51232	2.21094e-48	4.59288e-47
RPL9	9.39658	8.13154	-1.26504	1.18606e-33	2.64154e-33
AC011558.1	4.83952	0	-4.83952	6.91385e-102	4.94062e-99
AKAP17A	5.22013	3.48209	-1.73803	4.6868e-46	2.46541e-45
SNRNP35	3.32144	2.19665	-1.1248	1.55848e-45	7.45136e-45
DCAF7	2.85276	4.60044	1.74768	2.55725e-48	4.59288e-47
RHOC	6.51142	5.36627	-1.14515	2.22414e-43	8.26282e-43
CDON	3.37845	1.58785	-1.7906	2.57535e-42	8.76809e-42
SLC25A39	4.97192	6.07915	1.10722	1.57598e-41	5.08638e-41
EHD4	2.11347	3.40165	1.28818	4.13398e-43	1.5051e-42
EIF3H	7.24217	6.04363	-1.19854	3.83225e-40	1.13339e-39
EIF2AK2	2.16017	3.93498	1.77481	2.13564e-48	4.59288e-47
PRICKLE3	1.98392	3.69813	1.71421	1.41736e-46	8.42658e-46
ENDOV	3.18876	1.65059	-1.53817	2.49559e-47	1.87714e-46
KRT6A	0.996067	2.34932	1.35326	9.2836e-14	1.28572e-13
ZDHHC20	2.35558	4.0494	1.69382	2.22525e-47	1.70147e-46
CAPN2	5.95526	4.67909	-1.27617	4.31909e-38	1.15531e-37
ABCC1	2.33521	3.47862	1.14341	1.32616e-40	4.03981e-40
STAT1	3.23858	5.55213	2.31355	2.98192e-47	2.16847e-46
GANC	2.9469	1.10524	-1.84167	2.05471e-48	4.59288e-47
TSC2	5.50337	4.0148	-1.48857	3.36185e-44	1.34935e-43
METTL22	3.69785	1.52139	-2.17646	3.48179e-48	4.78118e-47
ZNF532	4.39395	2.72625	-1.6677	3.79696e-47	2.66505e-46
CDH11	5.52891	2.31776	-3.21115	1.25468e-44	5.28469e-44
STRA6	0.777926	2.00341	1.22548	5.71728e-25	1.00001e-24
ECE2	0.758439	2.5021	1.74366	1.52959e-45	7.33944e-45
HCFC2	2.31276	1.29654	-1.01622	6.49391e-46	3.31834e-45
ACAD8	3.3848	2.0704	-1.3144	2.43283e-47	1.83667e-46
ADAMTS9-AS2	2.63084	0.128228	-2.50261	2.16338e-48	4.59288e-47
ZNF528	3.15298	1.56833	-1.58465	1.94291e-46	1.11828e-45
NEK2	0.160296	3.10308	2.94278	2.26374e-48	4.59288e-47
NOMO3	2.99444	0.623017	-2.37142	2.08138e-48	4.59288e-47
CTHRC1	1.34249	4.71356	3.37107	4.45739e-46	2.35269e-45
C9orf16	4.21679	6.67616	2.45936	4.00942e-48	5.14547e-47
CRIP1	3.74774	2.41121	-1.33653	1.05569e-15	1.51797e-15
CASP4	4.31478	3.23609	-1.07869	3.60736e-33	7.90258e-33
FZD6	1.9913	4.12658	2.13528	5.92018e-47	3.88545e-46
ERICH6-AS1	0.886421	2.17737	1.29095	2.8609e-40	8.52352e-40
POLR1D	5.79491	4.13715	-1.65776	4.4784e-47	3.06913e-46
DNM3OS	2.72119	0.887297	-1.83389	3.8673e-43	1.41077e-42
ABCF2	3.07704	4.36128	1.28424	7.10442e-44	2.75215e-43
FNBP4	5.59385	3.32227	-2.27158	2.08131e-48	4.59288e-47
HIST1H3I	0.0252243	1.15569	1.13046	2.05161e-44	8.46103e-44
IQANK1	0.207371	3.39632	3.18895	1.03275e-46	6.34122e-46
RPL37AP1	0.397914	3.51229	3.11438	1.9971e-48	4.59288e-47
RAC2	1.7606	3.4215	1.6609	1.57755e-32	3.38484e-32
TNFAIP3	4.76318	3.24585	-1.51734	7.76727e-30	1.53765e-29
CFL2	4.31225	2.7329	-1.57935	1.81677e-44	7.52768e-44
ZFHX3	1.2491	2.2497	1.00061	1.16579e-37	3.04718e-37
PBK	0.160646	3.20884	3.04819	2.33726e-48	4.59288e-47
DACT1	2.96404	1.1613	-1.80274	1.29522e-41	4.1989e-41
MAIP1	2.10717	3.77172	1.66455	2.05467e-48	4.59288e-47
IGKV1-12	0.0979499	1.53026	1.43231	3.9179e-26	7.04449e-26
NUTM2A-AS1	3.40928	1.65198	-1.7573	3.10156e-48	4.67701e-47
SLC30A7	1.61854	2.6533	1.03476	1.50971e-46	8.9273e-46
ZNF23	2.34204	0.12971	-2.21233	2.05468e-48	4.59288e-47
MARVELD3	0.509928	1.82591	1.31598	5.89808e-45	2.58323e-44
C9orf147	1.62594	0.551706	-1.07423	2.04826e-40	6.1587e-40
TUBA1C	4.45503	5.72597	1.27094	1.18897e-31	2.47838e-31
SNORA74B	0.175699	1.25157	1.07588	1.80342e-29	3.53996e-29
OARD1	3.55765	2.20993	-1.34772	2.18233e-45	1.02105e-44
LY86	0.674379	2.63204	1.95766	5.04161e-42	1.68076e-41
AC006970.1	0.119515	1.41599	1.29648	1.18338e-47	1.02931e-46
LCAT	4.04162	1.81078	-2.23084	1.86168e-47	1.47631e-46
AC015688.6	2.66446	0	-2.66446	6.91405e-102	4.94062e-99
GASK1A	2.44192	0.923988	-1.51793	4.40043e-41	1.37938e-40
SPNS1	3.51321	1.34546	-2.16775	2.05471e-48	4.59288e-47
HLA-DRB6	0.5453	3.45332	2.90802	2.26659e-38	6.13683e-38
AKR1C1	3.29136	0.309133	-2.98222	3.06193e-48	4.67701e-47
RNU7-45P	0	1.05943	1.05943	4.38576e-36	1.07285e-35
MMP11	2.45567	3.95353	1.49786	8.67871e-10	1.10933e-09
NFASC	3.17692	0.607259	-2.56966	5.65763e-46	2.9353e-45
APEX2	2.29012	4.08388	1.79376	2.33698e-48	4.59288e-47
RPS19P1	0.206398	1.7276	1.5212	1.817e-47	1.44822e-46
ZBTB33	1.61712	3.48148	1.86436	2.0813e-48	4.59288e-47
POMT1	4.16301	2.52204	-1.64097	9.58465e-48	8.76367e-47
BMP7	0.3044	3.65003	3.34563	1.13804e-40	3.4793e-40
AC005790.1	0.134918	1.22216	1.08724	1.68268e-40	5.09078e-40
AL024508.2	0.175211	1.65763	1.48242	1.79192e-47	1.43253e-46
MTATP8P2	0.0635719	2.54364	2.48007	1.18519e-48	4.59288e-47
SRXN1	2.82327	1.27593	-1.54734	4.4784e-47	3.06913e-46
RBM4	5.54068	2.11976	-3.42091	2.0546e-48	4.59288e-47
AL355574.1	0.187771	2.20479	2.01702	4.88714e-48	5.71652e-47
MOB1A	3.53746	5.35121	1.81375	5.58648e-46	2.90196e-45
ZFP28	2.3819	1.13628	-1.24562	2.02512e-45	9.52061e-45
P3H3	4.70304	2.40346	-2.29958	1.93229e-44	7.98843e-44
MUC1	2.40652	7.00362	4.5971	1.58761e-46	9.35038e-46
IGLV2-14	1.62461	4.24314	2.61853	3.58366e-16	5.19554e-16
LRPAP1	5.65642	4.01392	-1.6425	1.21033e-46	7.30798e-46
FAM184A	1.89494	0.262694	-1.63225	3.39349e-48	4.76557e-47
SPTSSA	3.09894	4.4144	1.31546	6.27841e-39	1.74705e-38
SETD7	2.76676	1.67047	-1.0963	1.69274e-37	4.3887e-37
CNIH2	0.594412	1.69717	1.10276	4.55756e-37	1.15994e-36
FURIN	3.36511	5.09417	1.72906	1.00639e-45	4.96885e-45
RPL34P27	0.568382	1.65028	1.0819	1.75397e-35	4.17996e-35
FPR3	0.58778	2.7488	2.16102	3.27265e-41	1.033e-40
BCS1L	4.42776	3.39083	-1.03693	5.77569e-41	1.79931e-40
SLBP	3.52914	5.32772	1.79858	2.19119e-48	4.59288e-47
CA4	1.67237	0.368877	-1.3035	1.15765e-36	2.89591e-36
XXYLT1	1.61912	3.19582	1.5767	3.45845e-45	1.56686e-44
MIR4297	0	1.08295	1.08295	5.1727e-34	1.1676e-33
RNASEH2B	3.20021	2.02425	-1.17596	3.38086e-46	1.83492e-45
TMPRSS3	0.196292	3.97265	3.77636	3.51681e-48	4.81945e-47
KLF16	1.71576	3.69296	1.9772	6.4453e-48	6.71258e-47
NLRP1	4.34235	1.0763	-3.26605	2.2198e-48	4.59288e-47
ZNF662	2.93255	1.35545	-1.5771	1.15801e-46	7.03104e-46
ZCCHC8	3.54656	2.04197	-1.50459	2.46047e-48	4.59288e-47
FAM166B	0.658514	1.72578	1.06726	1.31202e-15	1.88289e-15
CRTAP	6.46803	5.05414	-1.41389	1.84722e-46	1.06825e-45
AC244090.1	1.59913	2.99561	1.39648	1.79523e-42	6.17317e-42
LRP1	6.76125	3.79482	-2.96643	4.73798e-48	5.58242e-47
AC007389.5	0.136974	1.23116	1.09418	8.52729e-40	2.4685e-39
DDR2	3.46543	1.63114	-1.83429	2.26791e-44	9.30144e-44
FUT8	2.1923	3.65967	1.46738	5.90475e-38	1.56992e-37
SLC25A5	5.61025	7.75172	2.14147	6.71588e-47	4.35347e-46
KLK7	0.251013	6.71219	6.46118	4.38297e-48	5.34563e-47
SNORD46	0	1.35485	1.35485	1.73684e-45	8.24025e-45
ADAM8	1.53281	2.84513	1.31231	1.26516e-31	2.63424e-31
KLHL9	2.24545	3.2646	1.01915	1.36572e-40	4.15691e-40
ENO1	7.06007	8.62564	1.56557	3.62169e-42	1.21831e-41
ASAP3	4.9583	3.06099	-1.89731	9.92111e-45	4.23447e-44
ATP8B2	4.3591	2.2847	-2.0744	2.22533e-47	1.70147e-46
MFHAS1	1.41132	3.01651	1.60519	3.42515e-43	1.25441e-42
KLF4	4.43992	2.27726	-2.16267	3.19392e-38	8.59623e-38
NMRK1	3.81267	2.19843	-1.61423	1.72209e-45	8.17879e-45
LINC01001	4.02966	0.37464	-3.65502	2.05473e-48	4.59288e-47
PPP1R12A	3.72984	2.50613	-1.22371	1.04494e-45	5.14438e-45
ARNTL	3.61936	1.39191	-2.22745	7.14089e-48	7.17936e-47
SRRM2	8.23315	5.84562	-2.38753	5.69716e-47	3.76305e-46
LGALS8	4.26523	2.82086	-1.44437	3.73636e-42	1.2562e-41
IRF2BPL	3.70691	5.7238	2.01689	1.46098e-43	5.50937e-43
GLT8D2	4.00403	1.97787	-2.02615	2.7393e-41	8.69528e-41
ELFN1-AS1	0.250139	2.50683	2.25669	3.6782e-32	7.78506e-32
CAMKK1	2.11696	0.922514	-1.19445	2.83513e-42	9.62609e-42
FOXN3	3.59184	2.35031	-1.24153	4.49936e-42	1.50451e-41
C1QTNF4	2.37823	1.37154	-1.00669	6.34454e-24	1.08291e-23
TRNP1	1.38753	3.93362	2.54609	8.73825e-42	2.86429e-41
AC104794.4	2.00651	0.210344	-1.79616	1.85701e-44	7.68576e-44
NDUFA9	4.16265	2.54105	-1.6216	1.42812e-45	6.89182e-45
RRP9	2.93833	4.54574	1.60741	3.21844e-47	2.31607e-46
ILF3	6.18221	5.1025	-1.07971	1.03504e-37	2.71457e-37
PLAGL2	2.01626	4.26295	2.24669	5.81737e-48	6.29124e-47
BCL11A	0.45651	2.43222	1.97571	5.5959e-39	1.56082e-38
TCAF1	3.50123	1.86185	-1.63938	1.21805e-46	7.34758e-46
MIGA2	3.5539	2.33469	-1.21921	6.59424e-45	2.86785e-44
CCDC51	1.82323	3.25238	1.42915	3.38084e-46	1.83492e-45
COL6A4P2	2.88271	0.324325	-2.55839	2.86846e-47	2.09887e-46
TRPM2-AS	0.115223	1.83983	1.7246	3.29196e-44	1.32412e-43
RRAGD	0.934785	2.18307	1.24828	1.51281e-35	3.61174e-35
ATRIP	1.82886	0.213278	-1.61558	2.05472e-48	4.59288e-47
S100A6	7.66972	9.11019	1.44047	2.59805e-24	4.47641e-24
AC004967.1	0.345604	4.30968	3.96408	2.0499e-48	4.59288e-47
HGS	5.55719	4.13849	-1.4187	4.39381e-47	3.02455e-46
PVRIG	1.3566	0.313261	-1.04334	4.95213e-41	1.54735e-40
TMPRSS4	0.182338	2.88108	2.69874	1.26295e-43	4.79058e-43
AC091042.1	0.79314	1.997	1.20386	5.46642e-23	9.15703e-23
MRPS16	3.90562	5.20907	1.30345	1.03338e-46	6.34122e-46
SMIM10L1	1.45585	3.12925	1.6734	3.90843e-48	5.07459e-47
PPIH	3.58797	5.0756	1.48763	1.53748e-47	1.26236e-46
FTH1P16	0.65675	2.29827	1.64152	2.49559e-47	1.87714e-46
F11R	2.82797	4.34793	1.51995	1.26573e-42	4.40953e-42
RPSAP54	0.722814	1.88796	1.16515	1.62908e-40	4.93039e-40
AL450384.2	2.14054	0.832063	-1.30847	6.93281e-44	2.68679e-43
SDR39U1	5.58264	2.33312	-3.24952	2.05465e-48	4.59288e-47
SLC7A1	1.23981	3.79581	2.556	4.42201e-47	3.03508e-46
DNAAF3	0.346711	1.46358	1.11687	1.03184e-36	2.5892e-36
NUP210	0.750393	3.82994	3.07955	2.87125e-48	4.61847e-47
DLGAP5	0.197062	2.82614	2.62908	3.38378e-48	4.76557e-47
FUS	7.41292	5.11615	-2.29677	2.08062e-48	4.59288e-47
CSNK1E	6.17098	4.20769	-1.9633	6.9601e-48	7.05692e-47
RCC1	2.80941	4.13901	1.3296	4.63603e-42	1.54971e-41
RHOJ	2.38065	1.20987	-1.17078	2.2122e-41	7.07426e-41
C9orf152	0.0907569	1.19695	1.10619	1.44177e-39	4.12991e-39
ODF2L	3.5717	1.77684	-1.79487	2.76257e-48	4.59288e-47
CTSW	0.604611	1.8227	1.21809	2.43578e-27	4.50202e-27
IL17RC	4.40224	3.12011	-1.28213	4.24546e-44	1.68471e-43
LPAR2	2.533	3.68907	1.15607	9.88758e-35	2.2857e-34
TEKT2	0.49204	2.12667	1.63463	2.79468e-40	8.3356e-40
PDIA4	4.43797	6.80147	2.3635	3.27992e-47	2.35372e-46
PIK3R3	1.38541	2.83415	1.44874	2.63107e-34	5.99714e-34
HRASLS2	0.242017	1.4474	1.20538	2.43593e-34	5.5619e-34
IGKV3-20	1.93656	5.18777	3.2512	5.89573e-19	9.04441e-19
SVIL-AS1	4.11597	1.81801	-2.29796	2.05472e-48	4.59288e-47
MIR3176	0	1.0786	1.0786	1.899e-37	4.91248e-37
MTIF2	2.49143	3.70451	1.21307	3.29677e-46	1.79463e-45
AC027449.1	3.00237	0.798802	-2.20357	2.62311e-41	8.34212e-41
TEPSIN	3.70134	2.02311	-1.67823	9.10666e-48	8.46821e-47
EGFL8	4.94652	0.71667	-4.22985	2.05473e-48	4.59288e-47
DDT	5.33453	3.77919	-1.55534	4.64087e-41	1.45278e-40
AC011462.2	2.9593	0.0119312	-2.94737	3.21548e-50	1.38931e-47
SMG6	4.17764	1.48347	-2.69416	2.10834e-48	4.59288e-47
SIRT2	4.91081	3.56461	-1.3462	6.7586e-42	2.23431e-41
GORASP2	4.01264	5.20245	1.18981	6.41245e-46	3.28062e-45
CBWD3	2.97777	0.110166	-2.8676	2.05471e-48	4.59288e-47
RELB	1.88563	3.81659	1.93096	2.35317e-44	9.61721e-44
RACGAP1	1.09805	3.75229	2.65424	2.65804e-48	4.59288e-47
ATG2B	2.66121	1.57407	-1.08714	2.87087e-46	1.58275e-45
DNLZ	2.53439	0.170539	-2.36385	2.05477e-48	4.59288e-47
GPCPD1	3.75518	2.56165	-1.19354	8.85213e-34	1.9803e-33
TRA2A	5.65478	4.26068	-1.3941	3.3944e-45	1.54122e-44
PRRX2	0.658848	4.0178	3.35896	8.99336e-46	4.47479e-45
PLIN4	3.02234	1.07158	-1.95076	1.1181e-40	3.42067e-40
TTK	0.24697	2.74814	2.50117	2.30703e-48	4.59288e-47
RPL14	8.85042	6.72749	-2.12292	2.94308e-48	4.62293e-47
AC253536.5	0.0576923	1.06278	1.00508	8.32228e-34	1.86379e-33
GADD45G	4.63328	2.67711	-1.95617	9.75799e-37	2.45091e-36
PFDN2	4.7568	6.16251	1.40571	3.17746e-47	2.29212e-46
IGLV3-1	0.760709	2.94807	2.18736	1.90618e-14	2.67645e-14
ARL17B	1.78924	0.278075	-1.51117	2.1083e-48	4.59288e-47
PTX3	0.772788	2.55178	1.779	9.03985e-33	1.95454e-32
RNU6ATAC18P	0	1.0719	1.0719	4.38574e-36	1.07285e-35
IGLV3-21	0.609414	3.44924	2.83982	2.93091e-21	4.72276e-21
MIR3648-1	0.093842	1.40931	1.31547	4.80778e-38	1.28394e-37
MMP15	0.691331	4.09741	3.40608	3.1015e-48	4.67701e-47
IPO4	2.87487	1.64569	-1.22917	7.57569e-43	2.69067e-42
VASP	3.51246	4.93997	1.42752	8.18376e-40	2.37133e-39
CSPG5	0.247537	1.69676	1.44922	4.37928e-45	1.95302e-44
BSCL2	4.25399	2.40694	-1.84704	1.19106e-47	1.03358e-46
OBP2A	0.13757	2.54546	2.40789	2.8086e-36	6.92791e-36
NPW	0.401872	3.49517	3.09329	2.49638e-46	1.39953e-45
TRIM46	0.406136	1.73099	1.32485	5.5977e-43	2.00927e-42
RPL12P47	0.325979	1.41587	1.08989	8.03536e-31	1.63407e-30
VPS37D	1.51132	3.53479	2.02348	4.89687e-45	2.16566e-44
PCBP1-AS1	4.40451	1.03401	-3.3705	2.05467e-48	4.59288e-47
DYNC1I1	1.77552	0.49357	-1.28195	7.17448e-43	2.55207e-42
RASSF7	1.90485	5.08392	3.17906	4.33116e-48	5.30822e-47
GYPC	5.3499	2.96355	-2.38635	2.76449e-46	1.53093e-45
REC8	2.57372	4.65536	2.08164	7.30875e-32	1.53175e-31
RUNDC1	1.64547	2.83321	1.18774	4.44391e-48	5.37876e-47
SNORA5A	0.466976	1.58247	1.11549	1.59662e-21	2.58867e-21
CDH4	1.71317	0.230101	-1.48307	2.37547e-41	7.57838e-41
GOLGA6L10	1.53937	0.275863	-1.26351	5.21267e-47	3.4804e-46
RTL10	1.70873	2.86847	1.15974	5.1022e-42	1.70064e-41
AL109811.2	3.49457	1.84975	-1.64482	2.76784e-42	9.40109e-42
AC090114.1	0.395297	2.74936	2.35406	2.1327e-48	4.59288e-47
GAL3ST2	0.156725	2.23047	2.07374	2.4577e-45	1.14125e-44
PPP1R14A	5.62281	3.80859	-1.81422	1.84449e-27	3.4214e-27
SP110	3.19229	1.25544	-1.93685	7.51609e-48	7.40046e-47
COMMD4	4.50337	3.16323	-1.34015	2.04242e-44	8.42496e-44
TEN1-CDK3	1.58379	0.485715	-1.09808	3.25984e-47	2.34116e-46
PCOLCE	5.85977	4.38718	-1.4726	1.55836e-25	2.75748e-25
ZNF821	2.11275	0.986763	-1.12598	6.02345e-46	3.10611e-45
RNU4-2	1.84109	3.78092	1.93982	9.32252e-13	1.26435e-12
RPL32	10.0411	8.76853	-1.27255	3.96723e-43	1.44609e-42
F10	3.64571	0.967594	-2.67811	8.98666e-45	3.85507e-44
MFSD6L	0.0720193	1.90863	1.83661	3.61026e-47	2.5533e-46
MACC1	0.139694	1.88007	1.74037	1.15487e-45	5.64193e-45
PHACTR4	2.76317	4.17271	1.40954	4.6522e-47	3.1719e-46
NDRG3	3.3567	4.41662	1.05992	1.81956e-43	6.79784e-43
TYMP	2.11879	4.27975	2.16096	1.41601e-33	3.14653e-33
SMIM22	0.340767	4.57849	4.23772	4.96598e-47	3.35015e-46
SNX15	2.95231	0.310476	-2.64183	2.05473e-48	4.59288e-47
ITPR1	4.06679	0.932447	-3.13434	8.32678e-48	7.96618e-47
PEX11B	3.3587	4.67414	1.31544	5.05187e-48	5.81446e-47
DPP3	2.2591	4.37867	2.11957	3.61839e-48	4.85777e-47
TRMT2A	4.74176	3.28091	-1.46085	7.62807e-47	4.86518e-46
CSNK2B	6.49254	5.05341	-1.43914	1.09153e-45	5.35174e-45
GNG5P2	0.0138737	1.54847	1.5346	1.48443e-48	4.59288e-47
GRINA	6.37857	7.68512	1.30655	6.91959e-39	1.92281e-38
ASF1A	2.28782	3.34312	1.0553	5.11135e-43	1.84326e-42
AC113935.1	4.55524	3.16585	-1.38939	7.74876e-29	1.49263e-28
ENHO	0.441996	2.29828	1.85629	6.73455e-41	2.0864e-40
MAP4K5	3.88776	2.50254	-1.38521	6.36321e-48	6.64953e-47
CCDC74B	2.12739	1.09823	-1.02915	3.14456e-26	5.66717e-26
SNX7	2.26014	3.35054	1.09039	6.31753e-33	1.37247e-32
AC234582.1	2.70451	1.6005	-1.10401	4.04699e-31	8.29997e-31
KIAA1211L	0.570904	2.69432	2.12341	3.94446e-47	2.75301e-46
FAM83H	0.36456	5.38864	5.02408	3.10121e-48	4.67701e-47
SLC35F6	2.3275	4.12462	1.79712	2.87111e-48	4.61847e-47
RAP1GAP	0.914154	3.3439	2.42975	2.87057e-47	2.09887e-46
WNT7A	0.037864	2.94338	2.90552	2.07173e-45	9.72234e-45
AC090425.1	0.108624	1.46183	1.35321	2.45906e-40	7.36055e-40
EHMT1	4.16715	2.33878	-1.82836	3.85868e-48	5.02747e-47
RPL23AP42	8.91501	4.18723	-4.72779	2.0538e-48	4.59288e-47
FBP1	0.645956	3.0215	2.37554	8.03936e-45	3.46953e-44
TNFRSF14	5.43026	2.66321	-2.76705	5.25019e-48	5.91559e-47
C1orf56	1.94464	3.20179	1.25715	2.40758e-43	8.91237e-43
NRROS	0.794967	1.80775	1.01278	5.46674e-34	1.23275e-33
ATP2B4	4.28103	5.43523	1.1542	1.88517e-32	4.03104e-32
WASH9P	3.98072	1.83092	-2.1498	5.74338e-48	6.2439e-47
CCL28	0.885325	3.07069	2.18536	4.86368e-42	1.62318e-41
BICDL2	0.236568	2.32208	2.08551	1.81663e-44	7.52768e-44
AGAP4	3.23117	0.964188	-2.26698	2.05475e-48	4.59288e-47
KPNA6	2.68655	4.08646	1.39991	8.65235e-48	8.18096e-47
CSNK1G1	1.26765	2.34378	1.07612	5.99586e-47	3.92797e-46
MOCS2	3.71922	2.67892	-1.0403	1.50044e-40	4.55353e-40
AC022509.2	0.077025	4.00496	3.92794	2.25273e-48	4.59288e-47
EP400P1	2.71259	0.898738	-1.81385	2.05464e-48	4.59288e-47
FAM156A	3.6743	0.0693278	-3.60497	2.05468e-48	4.59288e-47
ZNF75A	3.36648	1.70424	-1.66224	3.95904e-48	5.10444e-47
TMSB4XP1	0.595069	2.05516	1.46009	9.61278e-23	1.60276e-22
C15orf65	0.785398	2.07741	1.29201	9.93999e-46	4.90896e-45
CCN5	5.95059	0.576861	-5.37373	3.48185e-48	4.78118e-47
N4BP2L1	4.4422	1.8997	-2.5425	1.98426e-47	1.5542e-46
LAMP5	2.14606	3.17782	1.03176	5.98843e-10	7.67886e-10
PRSS53	1.5396	0.296071	-1.24353	2.42907e-48	4.59288e-47
KCTD14	0.561299	2.748	2.18671	3.41583e-45	1.54938e-44
PITX1	0.563833	2.41977	1.85593	4.11337e-20	6.45786e-20
DCLK1	1.99118	0.362104	-1.62907	1.14771e-45	5.6099e-45
RHBDF1	5.18259	2.69187	-2.49072	3.6186e-48	4.85777e-47
H19	6.75775	5.18011	-1.57764	1.9748e-07	2.4018e-07
INPP5B	3.65782	1.72374	-1.93408	1.65988e-47	1.34319e-46
GRIP2	2.11566	0.131186	-1.98447	2.30722e-48	4.59288e-47
TSACC	0.276343	1.41526	1.13892	3.00837e-45	1.37734e-44
OXTR	0.612805	2.2034	1.59059	1.14304e-25	2.02988e-25
IFIT5	1.63684	3.07001	1.43316	8.60097e-43	3.03402e-42
ZNF559	3.74197	1.91506	-1.82691	3.17478e-46	1.7323e-45
SUMO2P1	0.832012	2.09251	1.2605	1.12063e-37	2.93365e-37
GPAA1	5.30133	6.34156	1.04023	8.91732e-35	2.06603e-34
NPIPB15	2.22805	1.13763	-1.09042	5.85787e-18	8.80246e-18
FBXO33	1.8242	2.9582	1.134	1.5979e-45	7.63172e-45
UBTD2	2.49959	3.6586	1.15902	3.69183e-46	1.98528e-45
UGGT1	1.82704	3.02494	1.1979	1.3679e-44	5.73969e-44
IGKV2D-29	0.362743	1.483	1.12026	6.74532e-12	8.97524e-12
GTF2E1	1.31609	2.65663	1.34054	4.79934e-48	5.63289e-47
SSX2IP	0.788864	2.27174	1.48287	1.23761e-47	1.06453e-46
SNORD36C	0	1.17214	1.17214	6.56294e-41	2.03493e-40
CMTM4	1.69676	2.70861	1.01185	1.38667e-38	3.79593e-38
TSPAN5	3.94505	1.04879	-2.89627	1.90982e-47	1.50481e-46
HSPA5	5.77774	7.27423	1.49649	2.7668e-42	9.40109e-42
SCGB3A1	0.600722	2.06075	1.46002	2.42168e-18	3.66805e-18
POLR2K	4.03473	5.85891	1.82417	4.73748e-48	5.58242e-47
LTA4H	5.39418	4.1035	-1.29068	1.39002e-40	4.22815e-40
CNPY4	3.53981	2.30904	-1.23077	1.16327e-42	4.06706e-42
CIAO3	3.23732	2.19991	-1.03742	3.19592e-41	1.00998e-40
TMEM240	2.82298	0.868243	-1.95474	7.9234e-47	5.02248e-46
MLPH	3.56895	2.50833	-1.06062	6.7311e-12	8.95697e-12
PPP6R2	4.51949	3.23238	-1.28711	1.14241e-42	3.99638e-42
CIRBP	8.2177	4.13696	-4.08075	2.05402e-48	4.59288e-47
CEP170B	2.05198	4.05598	2.004	4.92726e-45	2.17857e-44
YIPF2	4.24781	5.46892	1.22111	3.99088e-42	1.33935e-41
ELOCP19	2.16671	0.521175	-1.64554	7.81587e-47	4.96934e-46
NCOR1	4.29758	3.0258	-1.27178	5.41741e-47	3.60624e-46
TEAD4	1.43505	3.97993	2.54488	1.20275e-46	7.26704e-46
PARM1	2.87443	1.37428	-1.50015	4.64345e-35	1.08845e-34
ADGRL1	2.42804	3.84867	1.42063	6.68019e-31	1.36193e-30
CDR2L	1.23671	4.86476	3.62805	3.22332e-48	4.7157e-47
TFCP2L1	0.203325	1.33608	1.13276	3.82498e-39	1.07413e-38
HIGD1A	4.17415	5.67925	1.5051	1.20129e-39	3.45457e-39
SKP1	7.6532	4.30643	-3.34676	2.05406e-48	4.59288e-47
CXCL9	0.274962	2.82678	2.55181	1.0044e-38	2.76621e-38
HLA-F	4.31418	3.07102	-1.24316	2.27536e-22	3.76205e-22
LGALS2	0.168712	1.30329	1.13458	1.3218e-40	4.02717e-40
ZNF148	1.88893	2.99708	1.10815	3.74889e-47	2.63541e-46
IGLC2	3.38376	5.68743	2.30366	5.61136e-11	7.33621e-11
PLK2	3.94917	2.89768	-1.05149	1.28764e-19	2.00193e-19
GON4L	3.65608	2.4075	-1.24859	1.68121e-47	1.35805e-46
SLC27A3	4.098	3.08576	-1.01224	1.50815e-30	3.04568e-30
ITGA10	1.63563	0.378714	-1.25691	4.06487e-45	1.82198e-44
NFKBIE	1.18544	3.36003	2.1746	5.31821e-48	5.95586e-47
SENP6	4.84697	2.71886	-2.12812	2.69235e-48	4.59288e-47
AC012617.1	1.43978	0.419978	-1.0198	6.73448e-41	2.0864e-40
TSPAN8	3.68533	1.19343	-2.4919	5.96395e-36	1.44898e-35
APMAP	4.15435	5.63801	1.48366	5.084e-47	3.41283e-46
CTNNAL1	5.56909	3.47343	-2.09566	7.75892e-41	2.39735e-40
OXLD1	3.09224	4.31994	1.22771	4.1118e-40	1.21394e-39
TSEN2	3.06146	1.89705	-1.16441	9.69442e-46	4.79278e-45
AMZ2P1	3.19824	1.59905	-1.5992	7.45343e-46	3.77133e-45
BEGAIN	1.8934	0.374102	-1.5193	3.9441e-44	1.57214e-43
ZSCAN5A	2.06132	0.84771	-1.21361	8.87942e-47	5.56581e-46
ANKRD6	3.29473	2.2221	-1.07263	2.04646e-29	4.00771e-29
AL162151.2	7.95004	4.33891	-3.61113	5.46295e-43	1.96317e-42
STIM1	4.60144	3.1523	-1.44914	3.23406e-41	1.02117e-40
PPIF	3.22735	5.53367	2.30632	3.14143e-48	4.67701e-47
LINC02041	0.0334442	1.87072	1.83728	6.6327e-39	1.84364e-38
EIF4A1	7.61319	1.64723	-5.96596	2.05441e-48	4.59288e-47
DOCK9	3.67525	2.20725	-1.468	3.32074e-44	1.33458e-43
PI3	0.481625	4.85693	4.3753	2.26736e-44	9.30144e-44
CAPSL	0.078423	1.37301	1.29459	3.16368e-35	7.46672e-35
RAB40A	1.52909	0.291303	-1.23778	6.20245e-48	6.55118e-47
OS9	6.35636	5.179	-1.17737	7.40584e-46	3.74913e-45
TRIM34	2.02774	0.190271	-1.83747	2.05428e-48	4.59288e-47
HDAC2	4.64065	3.22165	-1.419	8.69421e-44	3.34777e-43
AAMDC	4.65669	3.22915	-1.42754	2.53587e-41	8.07574e-41
ERBB3	0.923609	4.15319	3.22958	4.09188e-44	1.62728e-43
AC007009.1	0.176071	1.26745	1.09138	1.76716e-35	4.20979e-35
SATB1	2.40404	1.17002	-1.23402	1.14617e-37	2.99924e-37
DOC2A	2.78305	0.528864	-2.25419	1.00682e-43	3.85206e-43
TGM1	1.25809	2.79821	1.54012	1.53e-23	2.5936e-23
KDM3A	3.74512	2.7046	-1.04052	7.21808e-42	2.37988e-41
IGSF10	4.66105	0.655651	-4.0054	2.69591e-46	1.49604e-45
AC083798.2	2.91609	1.12398	-1.79211	4.25674e-47	2.94663e-46
ATAD2B	2.03256	1.00418	-1.02838	4.40182e-46	2.32598e-45
POLR2J3	5.22021	0.735269	-4.48495	2.05475e-48	4.59288e-47
ST6GALNAC6	5.67424	3.4171	-2.25714	1.67049e-47	1.35116e-46
C2CD2	3.41275	2.06698	-1.34577	4.29801e-44	1.70516e-43
FABP4	2.16816	1.01267	-1.15549	1.61996e-19	2.51355e-19
ELN	4.36863	2.72592	-1.64271	1.37555e-25	2.43625e-25
ARHGAP33	4.38012	2.65804	-1.72208	8.58691e-38	2.26068e-37
LEFTY2	3.38434	0.581332	-2.80301	1.24947e-42	4.35532e-42
NAGK	4.99285	3.3873	-1.60555	3.39334e-48	4.76557e-47
AGBL3	1.73013	0.525626	-1.2045	1.57731e-47	1.28704e-46
H3F3AP6	0.450703	2.08046	1.62976	9.51693e-48	8.7273e-47
HERC2P3	3.74337	0.385323	-3.35804	2.16339e-48	4.59288e-47
FLT3LG	3.20924	0.661632	-2.54761	2.05473e-48	4.59288e-47
AC023157.1	0.502152	2.25388	1.75173	5.70955e-46	2.96141e-45
SF3B5	5.51226	6.90016	1.3879	6.12099e-48	6.50487e-47
FBLN5	5.46114	3.47649	-1.98465	1.49093e-36	3.71762e-36
ERVK3-1	4.03298	1.84859	-2.1844	5.5979e-48	6.13978e-47
HMGN2P15	2.15428	0.827524	-1.32676	3.85061e-37	9.83238e-37
NAALAD2	2.30158	0.297578	-2.004	2.19724e-47	1.68549e-46
P4HA1	3.63628	4.95566	1.31938	7.24565e-33	1.57079e-32
FAM83D	0.441068	3.83973	3.39866	2.06156e-47	1.60124e-46
TNFRSF11B	0.421504	2.20621	1.78471	3.44189e-37	8.80569e-37
TMEM65	1.48262	2.5544	1.07178	9.4995e-42	3.10669e-41
CAMK2D	2.9365	1.88022	-1.05628	4.31921e-38	1.15531e-37
SLC35E1	2.6812	4.19669	1.51549	2.25386e-47	1.71969e-46
AC005674.2	1.75074	0.63417	-1.11657	7.04538e-43	2.50807e-42
CCDC82	3.55504	2.04355	-1.51149	7.42061e-48	7.357e-47
C19orf53	5.88224	7.2238	1.34156	5.52443e-44	2.16537e-43
FAM181A	0.0449725	2.40128	2.35631	8.79724e-48	8.27564e-47
TMEM14A	3.51386	5.07165	1.55779	3.54521e-45	1.60122e-44
CYC1	5.0452	7.26376	2.21856	4.35726e-48	5.33643e-47
SEPHS1	3.39997	4.53948	1.1395	1.39995e-43	5.28973e-43
STX4	4.87788	3.2529	-1.62498	2.05464e-48	4.59288e-47
AC060780.3	0	1.23658	1.23658	4.47632e-40	1.31862e-39
BANP	3.10054	1.69049	-1.41005	3.34993e-48	4.76232e-47
RPL37	9.62144	7.32373	-2.29772	9.03473e-48	8.43922e-47
ENO3	2.79306	1.29365	-1.49941	5.91212e-44	2.30614e-43
AFG3L1P	3.507	1.03818	-2.46882	2.05471e-48	4.59288e-47
GRHL3	0.193408	1.50891	1.3155	4.08694e-44	1.62663e-43
LAMTOR2	3.76005	5.09676	1.33671	7.64562e-44	2.95502e-43
FYN	4.05695	2.83657	-1.22037	2.78488e-29	5.42978e-29
AC080013.3	1.3981	0.342265	-1.05583	9.34774e-43	3.2904e-42
DBNDD2	3.83129	1.96158	-1.8697	1.71203e-43	6.4103e-43
DNPH1	4.23001	5.66575	1.43574	2.37378e-38	6.41811e-38
ADRA2C	1.34702	4.16839	2.82137	2.80988e-36	6.93015e-36
ZNF638	5.6118	2.63066	-2.98114	2.05473e-48	4.59288e-47
TK2	3.55297	1.88	-1.67297	4.1144e-48	5.20387e-47
PRSS22	0.250025	2.78226	2.53223	3.33223e-44	1.33858e-43
HPN	0.86519	3.72175	2.85656	3.79623e-32	8.02939e-32
BIRC6	3.52205	2.42111	-1.10094	2.10624e-44	8.66898e-44
HTR3A	0.0472419	2.79685	2.74961	2.69418e-44	1.09392e-43
GBP2	4.96901	3.04233	-1.92668	3.47046e-40	1.0295e-39
TOP2A	0.474603	4.04272	3.56811	2.69237e-48	4.59288e-47
MIR5587	0	1.11258	1.11258	1.12967e-31	2.3561e-31
LRRC56	0.974459	2.13652	1.16206	5.37105e-36	1.30733e-35
TSPAN33	1.26414	3.36658	2.10245	1.48257e-45	7.12705e-45
C5orf51	2.2551	3.48791	1.23282	9.70806e-48	8.86583e-47
MT-ND5	8.56541	10.5829	2.01751	1.38163e-36	3.44739e-36
SMYD4	2.4754	1.39488	-1.08052	7.10311e-45	3.07906e-44
IGHV3-11	0.450447	2.12903	1.67858	1.29408e-14	1.82432e-14
TACC1	4.39205	2.30603	-2.08602	2.73066e-45	1.25794e-44
LTF	0.434259	1.54985	1.11559	2.22745e-16	3.244e-16
NOL8	3.60151	2.212	-1.38951	2.5599e-47	1.91546e-46
Z74021.1	2.08101	3.76367	1.68265	2.96498e-33	6.51605e-33
DSP	0.957923	5.34217	4.38424	2.72972e-46	1.51362e-45
AL583805.1	0.0709189	1.83204	1.76112	1.94735e-48	4.59288e-47
SKA1	0.131529	2.04497	1.91344	2.75279e-48	4.59288e-47
SDC3	2.19339	4.57004	2.37665	1.61084e-42	5.56174e-42
ATP1A2	2.57789	0.452868	-2.12502	2.21021e-40	6.6296e-40
PAEP	0.200066	2.18947	1.9894	5.79281e-34	1.30517e-33
ABR	4.08942	2.07057	-2.01885	1.03348e-46	6.34122e-46
ARHGAP22	1.7957	0.781856	-1.01385	1.39004e-40	4.22815e-40
SLC25A27	5.54601	1.54036	-4.00565	2.55741e-48	4.59288e-47
ZBED5	4.39297	2.54366	-1.8493	2.05471e-48	4.59288e-47
RPL13P12	5.15209	6.22482	1.07273	1.92417e-07	2.34053e-07
LINC02614	2.66471	0.534148	-2.13057	2.4924e-48	4.59288e-47
FXYD4	0.0394833	1.08407	1.04459	1.78932e-35	4.26092e-35
NCAPH	0.33436	2.86642	2.53206	4.22152e-48	5.2569e-47
ARHGEF16	0.839128	2.03781	1.19869	2.20082e-36	5.44839e-36
SLF2	3.59091	1.96811	-1.62281	2.34161e-47	1.77649e-46
MAPK8IP1	2.29594	4.13539	1.83945	2.94135e-41	9.31119e-41
HNRNPAB	4.7546	6.54859	1.79399	7.34087e-47	4.71776e-46
SLC52A3	0.760246	2.43995	1.6797	1.5201e-45	7.29764e-45
CST6	0.584602	2.51923	1.93463	3.95969e-39	1.11129e-38
SMC5	4.20605	2.81861	-1.38744	6.05603e-43	2.16834e-42
NINL	3.85806	1.91801	-1.94005	2.09926e-42	7.18551e-42
SORL1	2.11624	3.33287	1.21663	9.62156e-29	1.84783e-28
IRX3	0.634268	2.74956	2.11529	1.12654e-24	1.95791e-24
RBM38	3.53839	6.60027	3.06188	2.08093e-48	4.59288e-47
AKAP9	3.99422	1.95323	-2.04099	3.48179e-48	4.78118e-47
PLA2G4C	1.66381	0.547784	-1.11603	2.90668e-41	9.20772e-41
SPPL2B	4.70263	2.8359	-1.86673	3.38657e-47	2.41815e-46
FAM171A2	1.61428	3.63703	2.02275	6.11577e-40	1.7874e-39
GFPT2	3.95731	1.48254	-2.47476	1.14346e-46	6.95634e-46
SHE	1.96496	0.40854	-1.55642	3.70162e-47	2.60798e-46
ALPK1	2.63859	1.33962	-1.29897	3.58995e-45	1.62006e-44
NR2C1	3.90744	2.15369	-1.75374	2.36728e-48	4.59288e-47
NDN	4.94502	3.12434	-1.82067	2.1713e-32	4.629e-32
SLC19A2	2.98571	1.9393	-1.0464	3.18395e-27	5.87376e-27
POLI	3.9298	1.29042	-2.63937	2.08137e-48	4.59288e-47
MIR200A	0	1.60184	1.60184	6.35549e-44	2.47182e-43
NFATC4	6.85317	2.66488	-4.18829	2.10828e-48	4.59288e-47
IGHV3-20	0.0490225	1.06703	1.01801	2.67097e-23	4.50227e-23
ALYREF	4.17046	5.49028	1.31982	3.86701e-43	1.41077e-42
HNRNPL	6.47828	5.367	-1.11128	4.47746e-47	3.06913e-46
DEPDC1	0.142465	2.17755	2.03508	3.48141e-48	4.78118e-47
TRMT6	2.01518	3.06071	1.04553	1.72767e-40	5.21754e-40
DIAPH1	3.09098	4.73149	1.64051	3.46691e-46	1.87789e-45
CCL11	0.24365	1.6517	1.40805	5.27039e-20	8.25481e-20
NAPSB	0.461024	1.6442	1.18318	4.38678e-34	9.92716e-34
ERP44	2.56341	4.50338	1.93997	3.26509e-48	4.72097e-47
PPIE	4.36744	2.83897	-1.52846	8.55415e-46	4.27574e-45
ZNF300P1	2.58773	0.561708	-2.02602	2.18554e-44	8.98374e-44
PCID2	4.52345	3.00237	-1.52108	7.27932e-48	7.2711e-47
SARM1	2.30125	0.935502	-1.36575	3.09605e-46	1.69281e-45
LIPT2	1.0378	2.4654	1.42759	5.04123e-44	1.98351e-43
LTB	0.480055	2.62235	2.1423	1.76206e-39	5.02569e-39
SLC6A8	2.68629	3.68786	1.00157	1.76264e-16	2.57291e-16
AL049840.2	2.05241	0.804789	-1.24762	7.26769e-46	3.68507e-45
SULT1A3	2.84921	0.0954985	-2.75371	2.05429e-48	4.59288e-47
MICAL3	3.64473	1.35398	-2.29075	2.46056e-48	4.59288e-47
CHMP4C	0.445772	3.76757	3.32179	5.21526e-47	3.4804e-46
FAM83A	0.173064	1.83167	1.65861	1.31589e-40	4.01047e-40
RNF139-AS1	1.96881	0.915112	-1.0537	1.11422e-37	2.91728e-37
FOXJ1	0.188618	4.63852	4.4499	7.87742e-48	7.65453e-47
DENND5A	4.32749	2.8162	-1.51129	3.09818e-47	2.24328e-46
GTF2IP4	4.80945	2.5081	-2.30135	1.51807e-47	1.24911e-46
COX11	4.02741	2.6462	-1.38121	3.93126e-46	2.10429e-45
AKIRIN2	3.74756	5.0994	1.35184	5.55635e-47	3.68586e-46
SUN2	5.91359	3.49904	-2.41455	2.03551e-47	1.58498e-46
NRP1	3.71173	2.38488	-1.32685	3.08153e-32	6.53932e-32
DDB1	5.76397	4.60553	-1.15844	9.2207e-46	4.57965e-45
FAM227B	2.34437	0.693165	-1.65121	3.2235e-48	4.7157e-47
MFF	4.90467	3.7954	-1.10927	4.42185e-47	3.03508e-46
MAGEA4	0.0136955	1.10318	1.08948	8.55286e-24	1.45598e-23
ALDH1B1	2.16633	3.97803	1.8117	3.23398e-41	1.02117e-40
CNTLN	2.01307	0.977457	-1.03561	3.18441e-43	1.16969e-42
FYB1	0.574449	1.76141	1.18696	6.44572e-31	1.31469e-30
ERCC5	4.34053	1.58078	-2.75975	2.05471e-48	4.59288e-47
TSPAN1	0.601446	4.06364	3.46219	4.40182e-46	2.32598e-45
DDX58	1.62962	3.5005	1.87088	4.77683e-45	2.11612e-44
ART5	1.8148	0.753825	-1.06098	3.27925e-33	7.19646e-33
REX1BD	4.98941	3.5326	-1.45681	1.4971e-43	5.63414e-43
ICA1L	2.56952	0.818568	-1.75095	2.00972e-47	1.56755e-46
CENPB	3.97119	5.34993	1.37874	2.26505e-45	1.05673e-44
EXOC3L1	2.78151	1.24929	-1.53222	2.13477e-41	6.83006e-41
ZBTB48	4.03266	2.57948	-1.45317	2.87046e-47	2.09887e-46
SLC39A11	1.31008	2.62209	1.31202	4.78028e-41	1.49469e-40
STC1	0.85797	2.53067	1.6727	1.22105e-35	2.92494e-35
JPT2	3.04495	4.97745	1.9325	2.05458e-48	4.59288e-47
MIR3682	0	2.3254	2.3254	1.71884e-48	4.59288e-47
DSN1	1.70285	3.3157	1.61285	8.11601e-48	7.80921e-47
EGLN2	5.01481	1.90181	-3.113	2.08134e-48	4.59288e-47
ATP5PO	6.44556	4.53227	-1.91329	2.55702e-48	4.59288e-47
WNT5B	2.20821	1.00606	-1.20215	1.91392e-30	3.8538e-30
NME2P1	0.314497	2.21818	1.90368	4.527e-48	5.45796e-47
AC233992.3	0.52264	1.57035	1.04771	5.60668e-41	1.74776e-40
MATR3	3.9982	0.401847	-3.59636	2.05464e-48	4.59288e-47
SMIM15	2.86274	4.12423	1.26149	4.31958e-46	2.28903e-45
PIK3CD-AS2	1.26793	2.54099	1.27306	1.20604e-28	2.30904e-28
AC099677.1	2.70288	1.69804	-1.00485	1.32931e-19	2.0662e-19
TIMMDC1	4.46816	5.60033	1.13217	1.65928e-46	9.7279e-46
UQCRFS1	2.85812	5.38636	2.52824	2.55723e-48	4.59288e-47
EFHD1	4.9637	2.82155	-2.14215	3.96084e-37	1.01043e-36
INTS6-AS1	2.11747	0.420222	-1.69725	2.21977e-48	4.59288e-47
AL669831.5	1.65932	0.391994	-1.26733	5.92047e-47	3.88545e-46
CLHC1	2.40057	0.81151	-1.58906	5.18348e-48	5.87234e-47
AUNIP	0.279123	1.93458	1.65546	9.34279e-48	8.61876e-47
TRAF3IP2-AS1	2.45446	0.821405	-1.63305	5.89248e-48	6.34654e-47
CENPA	0.223388	3.11833	2.89494	4.2639e-48	5.27532e-47
OBSL1	7.62625	4.2242	-3.40205	1.10079e-46	6.71423e-46
CHEK1	1.03422	2.22334	1.18912	1.12265e-44	4.75773e-44
EXOSC10	5.09994	3.69411	-1.40583	2.72811e-47	2.01456e-46
TMEM80	4.01256	2.78837	-1.22419	4.33314e-37	1.10402e-36
DAD1	6.152	7.86374	1.71174	9.51406e-48	8.7273e-47
RPIA	2.73039	4.15046	1.42007	3.10137e-48	4.67701e-47
RNF2	1.84193	3.49225	1.65032	3.14157e-48	4.67701e-47
AL513327.1	2.13792	0.555983	-1.58194	1.00877e-47	9.09817e-47
IGLV7-46	0.330643	1.6895	1.35886	3.11459e-20	4.90182e-20
CCDC71	2.89325	4.39007	1.49682	5.31791e-48	5.95586e-47
SIT1	0.233701	1.26256	1.02885	1.20163e-33	2.67558e-33
TNK2	3.94964	2.6869	-1.26273	6.27864e-39	1.74705e-38
RPS2P4	0.302112	1.45041	1.14829	8.87936e-47	5.56581e-46
EIF3F	7.24349	4.59647	-2.64702	2.05434e-48	4.59288e-47
IGLV2-11	0.897764	3.00982	2.11206	3.10235e-15	4.42454e-15
COX6A1P2	1.32	3.91001	2.59001	4.01007e-48	5.14547e-47
AC005884.2	0.0523601	1.90191	1.84955	4.66296e-48	5.55341e-47
UFSP2	4.07635	2.78783	-1.28852	1.73444e-46	1.01021e-45
GRN	5.19897	7.22662	2.02765	7.04163e-46	3.58036e-45
AL449212.1	0.0808818	1.90535	1.82447	4.16167e-48	5.22132e-47
DCAF12	2.6986	4.53822	1.83962	2.16327e-48	4.59288e-47
ATAD3B	3.68208	2.05566	-1.62643	3.50181e-45	1.58413e-44
TFAM	2.44591	3.53795	1.09205	1.61077e-43	6.04091e-43
MIR4477B	0	1.82016	1.82016	1.37329e-44	5.75556e-44
CDC42	5.34523	6.37948	1.03425	2.87153e-41	9.09947e-41
ZNF777	2.38807	4.00279	1.61472	7.51595e-48	7.40046e-47
GALK2	2.53142	1.00844	-1.52298	3.85868e-48	5.02747e-47
SLC25A24	2.39353	3.55544	1.1619	6.17115e-44	2.40364e-43
PTER	0.819931	2.32798	1.50805	1.83814e-47	1.46072e-46
TDRP	3.13486	1.87426	-1.2606	6.94659e-33	1.50666e-32
GAB2	3.02064	4.27592	1.25528	6.08501e-28	1.14288e-27
MMP23B	5.11704	0.807677	-4.30936	2.4291e-48	4.59288e-47
CRADD	2.49946	1.26932	-1.23014	2.2039e-46	1.25371e-45
NFS1	3.62651	2.56509	-1.06142	4.8293e-44	1.90456e-43
ZNF160	3.51579	1.952	-1.56379	1.2492e-46	7.51829e-46
PRDM11	2.42417	1.35371	-1.07046	1.43149e-40	4.34937e-40
BTAF1	3.84524	2.20873	-1.63651	5.62723e-47	3.72355e-46
CCDC136	1.69207	0.295717	-1.39636	5.59811e-48	6.13978e-47
MYCBP	2.04632	3.51699	1.47067	1.21807e-46	7.34758e-46
L3MBTL4	1.82833	0.787676	-1.04065	1.85674e-38	5.04555e-38
2022-09-05	4.11752	1.93978	-2.17774	1.74374e-45	8.27087e-45
AC005262.1	0.00500592	1.03676	1.03175	1.66771e-48	4.59288e-47
TRIM22	4.85323	3.15911	-1.69413	3.87827e-40	1.14628e-39
AC113139.1	0.178181	1.18982	1.01164	5.07283e-39	1.41769e-38
IGHG4	1.16137	2.75495	1.59357	2.79791e-09	3.53646e-09
DEF8	4.54756	2.52295	-2.02462	2.05471e-48	4.59288e-47
MYL12B	6.7152	8.13149	1.41629	1.81096e-46	1.04979e-45
USP34	4.65207	1.99392	-2.65815	2.13566e-48	4.59288e-47
TAF1C	5.53324	2.99784	-2.5354	2.55725e-48	4.59288e-47
HSD17B7	3.08083	1.71157	-1.36926	9.10632e-46	4.52747e-45
GABARAP	8.079	4.58784	-3.49116	2.05354e-48	4.59288e-47
RCOR3	4.07817	2.77068	-1.30749	4.03119e-46	2.14976e-45
AL391069.2	0.29425	1.92056	1.62631	6.97375e-47	4.50349e-46
AL117190.1	2.36976	0.102801	-2.26696	9.16737e-48	8.51603e-47
LMCD1	5.03084	2.29399	-2.73685	2.1148e-47	1.63439e-46
LETMD1	5.12685	3.37845	-1.7484	1.80328e-47	1.441e-46
AL445524.1	1.15481	3.47175	2.31694	3.5182e-47	2.49674e-46
CLSTN2	4.13063	1.00943	-3.12119	6.25452e-46	3.20913e-45
HLA-DPB1	3.53666	5.98686	2.4502	6.09823e-36	1.48076e-35
ZNF540	2.48058	0.243945	-2.23664	5.96856e-48	6.40982e-47
TMEM160	2.31538	5.17271	2.85733	2.79833e-48	4.59288e-47
AC005041.1	1.52974	2.66145	1.13171	5.83701e-35	1.36273e-34
TMEM259	6.43617	4.97105	-1.46512	1.35571e-46	8.09331e-46
INTS7	1.57833	2.72317	1.14484	6.41314e-46	3.28062e-45
TRA2B	5.52531	4.02204	-1.50326	4.92413e-48	5.73591e-47
SAFB2	5.75677	3.18453	-2.57224	2.16323e-48	4.59288e-47
LINC00665	2.99059	4.14454	1.15395	6.66153e-36	1.6153e-35
NEURL2	2.3299	1.03526	-1.29465	8.03539e-46	4.03922e-45
FAM3B	0.260455	1.96515	1.7047	3.65129e-39	1.02613e-38
C5orf56	3.13448	1.04701	-2.08747	4.27605e-48	5.27532e-47
AADAC	0.175706	1.6139	1.43819	6.22122e-39	1.73212e-38
AC087477.2	1.86546	0.240275	-1.62519	1.47986e-47	1.22579e-46
CPD	1.82348	2.84867	1.02518	1.6093e-38	4.38983e-38
THRA	4.99025	3.24042	-1.74983	2.17632e-46	1.23954e-45
BAZ2B	3.66192	1.5096	-2.15231	5.31824e-48	5.95586e-47
PRXL2B	2.18078	4.17616	1.99538	1.03348e-46	6.34122e-46
RNF183	0.423788	1.44612	1.02233	1.09508e-30	2.22089e-30
GGT5	3.1112	1.75037	-1.36083	1.0011e-24	1.74233e-24
ACTA1	1.49906	0.430243	-1.06882	2.42787e-30	4.87438e-30
ZMYM6	2.50135	1.26673	-1.23463	4.33129e-48	5.30822e-47
RPL13	12.0413	8.25094	-3.7904	2.54561e-48	4.59288e-47
CBX2	1.19515	2.33986	1.14471	2.97009e-25	5.21858e-25
POLG2	3.42587	2.15549	-1.27038	3.04699e-44	1.23041e-43
ZSCAN16	1.18705	3.02051	1.83345	6.04551e-48	6.45455e-47
FLAD1	3.11733	4.34666	1.22933	4.13342e-46	2.19939e-45
CAMK1D	1.14892	2.59471	1.44579	4.65091e-38	1.24276e-37
RNA5SP498	0.0486791	1.18604	1.13736	3.01564e-38	8.12935e-38
SNAPIN	4.00752	5.13148	1.12395	1.85579e-45	8.77383e-45
THAP10	1.09581	2.27339	1.17758	1.87917e-45	8.87498e-45
BPNT1	2.47462	3.74599	1.27138	1.41951e-44	5.94257e-44
DHRS2	2.9209	0.384094	-2.53681	1.86207e-41	5.98122e-41
CYP11A1	3.91862	1.01465	-2.90397	2.48419e-42	8.47012e-42
ANKRD11	4.58107	2.92539	-1.65568	6.78408e-48	6.91059e-47
TCHP	2.98296	1.56337	-1.41959	4.86152e-48	5.69145e-47
AC006942.1	2.12109	1.02729	-1.0938	1.27554e-36	3.18653e-36
GPM6A	1.55212	0.470512	-1.0816	3.54199e-31	7.27708e-31
TTLL3	6.11079	1.45594	-4.65485	2.05468e-48	4.59288e-47
HEPH	2.80967	1.18889	-1.62078	6.95256e-40	2.02436e-39
BLACAT1	0.205973	2.48341	2.27744	5.99564e-47	3.92797e-46
OR7E22P	0.152661	1.52906	1.37639	2.42893e-39	6.88229e-39
AC244197.3	3.43752	0.440618	-2.9969	2.05476e-48	4.59288e-47
MPZL2	1.58455	4.06905	2.48451	2.83251e-39	8.00505e-39
SDE2	1.95836	3.19878	1.24042	1.47336e-45	7.08975e-45
NEURL4	4.08424	1.92594	-2.15829	2.76255e-48	4.59288e-47
AURKAIP1	4.76603	6.04788	1.28185	1.65866e-45	7.90257e-45
CDC6	0.474941	1.98389	1.50895	5.02058e-47	3.37839e-46
WDR19	4.78864	1.93751	-2.85113	2.46049e-48	4.59288e-47
AP001024.1	0.040425	2.52784	2.48742	1.43308e-48	4.59288e-47
SIK1	3.14487	0.338766	-2.8061	1.02044e-46	6.27585e-46
SFTPD	0.394053	1.65907	1.26501	9.62927e-33	2.07953e-32
EPHA1	1.3269	3.30594	1.97904	5.69879e-44	2.22856e-43
PRSS21	0.294074	4.01735	3.72327	4.0544e-40	1.19737e-39
ZNF266	3.95811	2.72622	-1.23189	2.02318e-35	4.80919e-35
DZIP1L	2.35776	0.660558	-1.6972	9.22288e-47	5.75006e-46
SLC25A42	3.33065	2.23234	-1.09832	3.81085e-38	1.02123e-37
COL16A1	6.73928	2.16625	-4.57303	2.24853e-48	4.59288e-47
RPS8	10.6943	9.64842	-1.04586	5.10609e-35	1.19464e-34
KIAA1109	4.25197	1.39697	-2.855	2.05471e-48	4.59288e-47
PSME3	3.4702	4.71733	1.24714	5.35959e-44	2.10312e-43
ATP5F1A	6.69277	5.20428	-1.48849	4.4887e-45	1.99879e-44
DYDC2	0.19199	1.39847	1.20648	2.22762e-41	7.12096e-41
LINC01836	0.324765	1.60905	1.28428	2.15801e-40	6.47716e-40
RPS15A	9.80657	6.22129	-3.58528	2.05162e-48	4.59288e-47
GADD45GIP1	3.66149	5.5584	1.89691	9.95853e-48	9.00007e-47
AC022149.1	3.56355	1.50218	-2.06136	1.63709e-38	4.46499e-38
VWF	3.99374	2.96689	-1.02685	2.9279e-17	4.34e-17
CAMK1G	2.83114	0.896416	-1.93472	1.65496e-37	4.29196e-37
FAM229A	3.10925	1.44136	-1.6679	4.32529e-45	1.93033e-44
TUSC2	3.08162	4.23807	1.15645	2.66343e-45	1.22972e-44
WDR45	5.10665	3.83406	-1.27259	1.31063e-40	3.99512e-40
CXCL14	1.32248	2.97969	1.65721	1.27613e-13	1.76211e-13
EPCAM	0.676128	7.27402	6.59789	2.72611e-48	4.59288e-47
NME2	7.64446	4.90142	-2.74304	2.05416e-48	4.59288e-47
UGGT2	2.84656	1.53965	-1.30692	9.10687e-47	5.68919e-46
KCNIP2	2.60538	0.778602	-1.82678	4.77196e-47	3.24165e-46
RELCH	2.99243	1.93298	-1.05945	9.02709e-43	3.18123e-42
KLHDC9	2.3401	3.37311	1.033	3.55172e-26	6.39289e-26
COX5B	6.02008	7.88739	1.8673	6.19566e-48	6.55118e-47
MUC20-OT1	5.72466	1.63756	-4.0871	2.05473e-48	4.59288e-47
METTL27	1.39935	2.85535	1.456	3.3625e-29	6.54018e-29
GALNT12	0.476461	2.55852	2.08206	6.20241e-48	6.55118e-47
AL589765.4	0.0354957	1.3772	1.34171	4.60404e-48	5.50731e-47
MTCO2P2	0.241586	3.03215	2.79056	1.87347e-48	4.59288e-47
PARVB	3.68128	1.9781	-1.70318	6.39309e-45	2.78624e-44
AP000432.1	0.0145739	1.81198	1.79741	3.7348e-41	1.17568e-40
CENPF	0.840021	2.79555	1.95553	3.096e-46	1.69281e-45
ST14	0.501841	6.05207	5.55023	4.00967e-48	5.14547e-47
NFIX	4.40743	5.52358	1.11615	2.12275e-25	3.74216e-25
DMTN	1.3452	3.37854	2.03333	2.54459e-40	7.61286e-40
TJAP1	4.23882	3.148	-1.09082	7.83546e-44	3.02588e-43
AL160408.2	4.35074	0	-4.35074	6.91405e-102	4.94062e-99
GAPDHP1	0.484133	3.87096	3.38682	2.05468e-48	4.59288e-47
AC004552.1	0.40409	2.09077	1.68667	3.80461e-42	1.27869e-41
ENKD1	3.85328	2.52808	-1.3252	1.05079e-43	4.01368e-43
AC055720.2	0.0137866	1.19347	1.17968	1.86191e-45	8.79993e-45
ADCY4	2.84519	0.809616	-2.03558	2.11882e-43	7.88416e-43
AC025165.1	2.0203	0.293807	-1.72649	7.71077e-48	7.50095e-47
MRGPRF	3.71879	1.87355	-1.84525	7.20827e-39	2.00063e-38
NDEL1	4.67422	2.53689	-2.13732	2.16328e-48	4.59288e-47
ICE2	3.35262	1.74161	-1.61101	2.42904e-48	4.59288e-47
CALHM6	1.44227	2.64835	1.20608	4.62371e-21	7.42471e-21
GID8	3.43467	4.67618	1.24151	1.30562e-46	7.82233e-46
JUP	4.25589	7.25192	2.99603	1.95422e-46	1.12442e-45
AP5B1	1.26184	2.67345	1.41161	2.27929e-43	8.46094e-43
DCTPP1	2.79797	5.50701	2.70904	3.30722e-48	4.74142e-47
CDKN1A	6.21859	4.02582	-2.19278	9.33066e-42	3.05416e-41
NEFH	2.53501	1.51761	-1.0174	1.73353e-12	2.33775e-12
ARHGEF28	3.55329	1.16832	-2.38497	6.12348e-48	6.50487e-47
RPL3	10.6805	8.73375	-1.94678	4.56035e-48	5.46624e-47
C12orf76	3.05839	1.54865	-1.50974	3.48181e-48	4.78118e-47
PRMT7	4.30838	1.98323	-2.32515	2.05467e-48	4.59288e-47
ANXA2P2	1.05392	2.95806	1.90413	4.03131e-46	2.14976e-45
CORO6	2.19347	0.360487	-1.83298	1.8149e-47	1.44718e-46
PAFAH1B3	3.01781	5.28144	2.26362	2.22528e-47	1.70147e-46
DRG2	3.96621	2.05169	-1.91452	2.05468e-48	4.59288e-47
AL031665.2	0.239685	2.51102	2.27134	2.65172e-47	1.97302e-46
INCENP	1.71384	3.11556	1.40173	8.03931e-45	3.46953e-44
IGKV4-1	1.12173	4.66528	3.54355	3.68838e-23	6.197e-23
CHST2	1.45802	2.70369	1.24567	5.88163e-26	1.05224e-25
LINC01535	0.596309	1.63327	1.03696	3.15254e-29	6.13566e-29
FKBP4	4.20887	5.66086	1.45199	5.24024e-38	1.3967e-37
RAF1	5.33018	3.84126	-1.48892	5.89237e-48	6.34654e-47
C8orf59	5.37403	4.15084	-1.22319	5.49969e-39	1.53444e-38
GTF2IP1	5.22364	0.301957	-4.92169	2.05471e-48	4.59288e-47
TTC21A	2.63748	0.984695	-1.65278	2.64692e-45	1.22301e-44
DACT3	2.78693	0.934338	-1.85259	1.12192e-42	3.92695e-42
AAR2	3.07047	4.32356	1.25309	4.15966e-46	2.21249e-45
RABIF	1.03643	3.40867	2.37224	2.05473e-48	4.59288e-47
ACTN4	5.93911	7.46152	1.52241	2.60002e-38	7.02322e-38
CTXN1	1.67364	6.91785	5.24421	2.05416e-48	4.59288e-47
AC098591.2	0.302026	2.10436	1.80233	3.72845e-48	4.94439e-47
CKMT2-AS1	2.43481	1.16757	-1.26724	3.02035e-47	2.19376e-46
PGM5P2	1.69531	0.270566	-1.42475	3.30161e-47	2.36471e-46
MAMDC2	4.22641	1.0202	-3.2062	2.62884e-46	1.46494e-45
EPHX2	4.22612	2.32839	-1.89773	8.71274e-45	3.74448e-44
PRR19	0.441183	1.45286	1.01168	2.87089e-46	1.58275e-45
COA7	1.38859	2.95185	1.56326	5.05218e-48	5.81446e-47
H2AFY	4.90982	3.82795	-1.08187	3.64113e-44	1.45575e-43
MT-CO3	11.9248	13.0302	1.10535	4.33899e-18	6.5354e-18
IL1RN	0.656046	2.69712	2.04108	4.21011e-43	1.53221e-42
YBX1P10	0.772773	3.3994	2.62663	2.16327e-48	4.59288e-47
AC092017.2	0.191591	1.30866	1.11707	5.49625e-43	1.97427e-42
CDK12	3.30254	2.2944	-1.00814	2.37687e-46	1.33741e-45
PARP14	2.47686	3.68101	1.20415	9.35261e-31	1.89966e-30
MRPS35	3.04703	5.50054	2.45351	2.0545e-48	4.59288e-47
SLC22A31	1.7072	0.642436	-1.06476	2.32895e-26	4.21238e-26
ADCY6	4.33873	2.13127	-2.20746	6.04562e-48	6.45455e-47
APBA1	1.8056	0.590313	-1.21529	2.59595e-46	1.44794e-45
STK11	4.35915	2.86626	-1.49289	3.54945e-48	4.83771e-47
AC012409.3	2.32589	0.0996697	-2.22622	1.57861e-48	4.59288e-47
LINC02166	0.179218	1.19565	1.01643	6.18843e-46	3.17786e-45
PTCH2	3.26616	0.88722	-2.37894	3.08476e-44	1.24401e-43
TMEM161B-AS1	2.77985	1.26796	-1.51189	1.82798e-44	7.56911e-44
CLIC5	0.393736	3.33812	2.94439	1.03346e-46	6.34122e-46
TUBG1	2.73244	4.40302	1.67058	9.33679e-46	4.63232e-45
FNTA	4.33085	3.29528	-1.03557	3.68391e-43	1.34625e-42
U2SURP	4.69976	3.50864	-1.19112	5.56053e-44	2.1787e-43
CD27-AS1	5.37912	3.2352	-2.14392	2.40209e-47	1.81564e-46
POLR2F	5.01009	0.0469396	-4.96315	2.05443e-48	4.59288e-47
B3GALT6	2.04714	4.09769	2.05055	2.49234e-48	4.59288e-47
NBEA	1.93592	0.385282	-1.55063	7.51628e-48	7.40046e-47
MRPL38	5.23807	2.44438	-2.79369	2.05463e-48	4.59288e-47
PPWD1	4.20912	2.462	-1.74712	3.52683e-48	4.82162e-47
MIR497HG	3.57708	0.323773	-3.25331	2.05476e-48	4.59288e-47
BTF3L4P2	3.65442	1.69902	-1.9554	6.96044e-48	7.05692e-47
TMEM158	0.744682	2.85138	2.1067	5.05425e-36	1.232e-35
BCL9	2.36702	4.13767	1.77065	1.11235e-45	5.44578e-45
AL161431.1	0.0851614	1.14076	1.0556	2.06041e-13	2.83453e-13
TMEM115	3.52464	4.88326	1.35862	1.11726e-47	9.85297e-47
ETFA	4.69165	3.57276	-1.11889	4.4525e-41	1.3953e-40
KIAA1755	2.67237	0.23107	-2.4413	2.08802e-47	1.61777e-46
FAM122C	2.81285	0.817503	-1.99535	5.84599e-47	3.84742e-46
WDR43	2.60049	3.98203	1.38154	2.49542e-47	1.87714e-46
AC007969.1	2.55196	5.37371	2.82175	2.55723e-48	4.59288e-47
SLC31A1	1.64691	3.14447	1.49756	5.51724e-46	2.87048e-45
MISP	0.252405	3.90116	3.64876	1.46104e-47	1.21318e-46
AL353763.2	3.14908	1.38581	-1.76327	9.10659e-46	4.52747e-45
ERRFI1	5.91829	3.56483	-2.35346	2.05524e-43	7.65371e-43
EZH2	1.4619	2.98353	1.52163	1.36796e-44	5.73969e-44
ARHGAP6	2.83042	0.483526	-2.34689	1.61811e-47	1.31451e-46
MFSD5	2.38426	4.14074	1.75648	1.7788e-46	1.03278e-45
SCN1B	2.2409	1.07519	-1.16571	5.71126e-35	1.33404e-34
CARD8	3.04658	1.36105	-1.68553	2.05465e-48	4.59288e-47
TPX2	0.356515	5.07064	4.71413	2.16323e-48	4.59288e-47
LAMC2	0.69131	4.38616	3.69485	6.9604e-48	7.05692e-47
CNOT11	2.9189	4.58149	1.6626	3.61821e-48	4.85777e-47
ZNF76	4.8827	2.83752	-2.04519	4.16764e-48	5.22132e-47
KANK2	6.47544	3.52073	-2.95471	4.16762e-48	5.22132e-47
MKNK1	4.18722	2.52795	-1.65927	2.79827e-48	4.59288e-47
METTL16	3.23913	2.2242	-1.01494	1.24971e-41	4.05638e-41
SNHG22	2.51602	0.54207	-1.97395	2.22538e-47	1.70147e-46
ATP8A1	3.05237	0.80474	-2.24763	9.3429e-48	8.61876e-47
OSBP2	0.788419	1.86876	1.08034	5.23677e-43	1.88597e-42
AL590139.1	0.145861	1.72191	1.57605	1.90528e-48	4.59288e-47
RPL13AP6	0.196216	1.63005	1.43383	6.04653e-48	6.45455e-47
MAD2L1BP	2.35434	3.76387	1.40952	2.62586e-47	1.95463e-46
SERPINF1	7.70198	4.42688	-3.2751	7.82218e-47	4.96934e-46
FOXO1	4.4675	3.0317	-1.4358	2.14193e-38	5.80538e-38
AC087500.1	1.87971	0.828181	-1.05153	1.15075e-44	4.86901e-44
TMEM206	0.985908	2.27362	1.28772	8.66193e-46	4.3284e-45
ZNF558	3.51278	1.93558	-1.5772	4.16703e-45	1.86466e-44
NUDT8	1.77948	2.96917	1.18969	1.34878e-30	2.72706e-30
RPL39P40	0.023236	1.44467	1.42144	2.10333e-44	8.66086e-44
GKAP1	2.74378	1.66313	-1.08066	8.17988e-39	2.2632e-38
SFI1	3.75939	1.53887	-2.22052	2.69242e-48	4.59288e-47
ALDH1A1	5.95993	2.9079	-3.05202	3.54553e-45	1.60122e-44
PPP4R4	1.74794	0.2194	-1.52854	1.00633e-46	6.19917e-46
TMEM63B	2.86916	3.99074	1.12157	1.36572e-40	4.15691e-40
SYNE3	1.45089	0.351027	-1.09986	8.88163e-46	4.42628e-45
ZNF446	3.1198	1.70605	-1.41375	1.41922e-45	6.85407e-45
TOMM20	5.07092	6.47253	1.40161	8.63908e-44	3.32792e-43
PEAR1	3.11881	0.737412	-2.3814	1.94294e-46	1.11828e-45
ZNF354B	2.75773	1.61359	-1.14413	8.93555e-47	5.59722e-46
AC116049.1	0.0933239	1.28977	1.19644	2.09415e-44	8.62496e-44
NAMPT	4.28628	3.28008	-1.0062	1.33837e-09	1.70324e-09
SNHG17	4.27161	3.24239	-1.02922	8.20747e-30	1.62427e-29
AK4	1.41698	2.97688	1.5599	8.6648e-34	1.93981e-33
MT-CYB	10.9309	12.1154	1.18451	4.21941e-17	6.23349e-17
SLC15A3	4.25337	3.19226	-1.06111	5.55315e-22	9.10126e-22
CLIP4	3.71952	1.77486	-1.94466	2.76255e-48	4.59288e-47
SHMT2	3.9708	5.05087	1.08006	3.42074e-35	8.06216e-35
SNORA14A	0	1.17131	1.17131	7.88381e-43	2.79158e-42
TMEM184B	3.48881	4.53927	1.05046	4.16356e-35	9.7806e-35
SEMA4G	3.26602	1.57769	-1.68833	2.6202e-40	7.83278e-40
EPPK1	0.138308	2.07252	1.93421	1.19872e-47	1.03876e-46
SPA17	0.943315	2.02946	1.08615	1.33523e-37	3.48124e-37
CEPT1	3.17868	1.9216	-1.25709	9.83305e-48	8.93795e-47
TAGLN2P1	0.357339	1.73119	1.37385	5.66902e-48	6.19341e-47
TREX1	2.94979	0	-2.94979	6.91385e-102	4.94062e-99
COX7A1	4.32477	1.90069	-2.42408	1.63828e-45	7.80855e-45
RSPO1	0.89935	2.75292	1.85357	5.28851e-15	7.50957e-15
IGLV6-57	0.324795	2.54662	2.22183	3.87486e-25	6.79224e-25
TMBIM4	5.15668	3.51458	-1.6421	1.43537e-46	8.52577e-46
RAP1B	4.98509	2.394	-2.59109	5.31801e-48	5.95586e-47
CSTF2	1.73201	3.18902	1.45701	2.62397e-48	4.59288e-47
VWA2	0.161786	1.38858	1.2268	1.30298e-40	3.97245e-40
SLMAP	3.5657	2.07722	-1.48848	4.55927e-48	5.46624e-47
HSD11B2	2.3671	3.37846	1.01136	1.08507e-16	1.59087e-16
AP003108.2	3.42017	0.160969	-3.2592	2.05471e-48	4.59288e-47
SIGLEC11	4.66215	0.633679	-4.02847	2.41103e-45	1.12044e-44
LYPD1	0.522392	5.2644	4.74201	4.42193e-47	3.03508e-46
CDCA2	0.188469	1.6224	1.43393	4.42204e-47	3.03508e-46
UNG	2.85669	5.00241	2.14571	6.04509e-48	6.45455e-47
UPK3B	1.3629	5.26908	3.90619	1.62393e-41	5.23556e-41
TPM1	7.20535	3.48457	-3.72077	2.05464e-48	4.59288e-47
BAG5	2.04833	3.76827	1.71994	3.14165e-48	4.67701e-47
UBD	0.184918	1.66719	1.48228	3.58765e-31	7.36843e-31
PTOV1	6.69647	5.22905	-1.46742	8.2908e-45	3.56975e-44
AL445189.2	0.181338	1.7321	1.55076	2.00969e-47	1.56755e-46
PGAP1	2.18433	1.11178	-1.07255	1.49248e-31	3.09923e-31
PRKD1	2.57464	1.2728	-1.30183	6.88111e-42	2.272e-41
RNU6-118P	0	1.81008	1.81008	4.34847e-47	2.99556e-46
CYCS	3.97392	5.29021	1.31629	1.02536e-26	1.86968e-26
MIR10B	0	1.55427	1.55427	7.20275e-40	2.09324e-39
HDGFL3	3.07381	1.79264	-1.28117	9.765e-44	3.73764e-43
JMJD7-PLA2G4B	3.21599	0.539968	-2.67602	3.14165e-48	4.67701e-47
GSTM5	5.94221	0.365525	-5.57668	2.72711e-48	4.59288e-47
CCNL1	6.32061	3.39196	-2.92865	2.05462e-48	4.59288e-47
SULT2B1	0.243213	1.31253	1.06931	1.24034e-34	2.85945e-34
FAM120A	3.95866	5.00854	1.04988	4.70298e-40	1.38364e-39
RPS6KA5	1.43457	0.421905	-1.01266	2.83458e-48	4.61154e-47
APOO	2.38466	4.14359	1.75892	4.53575e-47	3.10506e-46
SNORA14B	0.0454849	1.61828	1.57279	5.30943e-44	2.08594e-43
LINC01436	0.721324	2.11986	1.39854	4.12666e-09	5.19651e-09
COA1	3.89717	2.34585	-1.55132	4.11446e-48	5.20387e-47
CFH	6.24547	2.51279	-3.73268	2.34715e-46	1.32388e-45
CCAR1	4.59	3.44745	-1.14254	1.21649e-44	5.13896e-44
MLLT6	6.10875	3.84746	-2.2613	1.45356e-46	8.62809e-46
RNF220	4.65977	3.35667	-1.30309	3.19483e-46	1.74169e-45
CSNK2A1	3.63195	4.97271	1.34076	1.35002e-45	6.54027e-45
ATG4B	5.19953	3.64201	-1.55752	3.47362e-47	2.46807e-46
NGRN	4.6337	3.10632	-1.52738	4.20305e-47	2.91489e-46
ING5	3.98714	2.00318	-1.98396	8.87642e-48	8.31685e-47
AC159540.2	3.44528	0.0179488	-3.42734	1.09599e-48	4.59288e-47
L3MBTL1	3.33744	1.17489	-2.16255	7.14111e-48	7.17936e-47
FXR1	5.12351	3.7352	-1.38832	1.73437e-46	1.01021e-45
WFIKKN2	5.55527	0.232799	-5.32247	1.00452e-47	9.0729e-47
TMEM50B	5.49424	3.79132	-1.70292	5.2944e-44	2.08058e-43
TMEM121	1.18961	2.4457	1.25609	2.18275e-32	4.65275e-32
JAM2	3.32188	1.13256	-2.18932	3.40351e-44	1.36486e-43
DPEP3	0.0867554	1.66262	1.57587	1.91564e-08	2.37794e-08
LRRC15	0.134702	1.36014	1.22544	3.27289e-16	4.75203e-16
LST1	1.29628	2.39566	1.09938	1.08127e-22	1.80057e-22
UBR5	4.75212	3.1825	-1.56962	1.60799e-46	9.45729e-46
METAP1D	2.97452	1.508	-1.46652	6.27531e-45	2.7394e-44
RGS19	1.18935	4.23719	3.04784	2.1913e-48	4.59288e-47
GNPNAT1	2.03045	3.28479	1.25433	2.20963e-45	1.03253e-44
LMBR1L	5.44067	2.24461	-3.19606	2.13563e-48	4.59288e-47
ABCD4	5.24073	2.39096	-2.84977	2.10829e-48	4.59288e-47
HSPB7	3.51351	0.904203	-2.60931	1.78777e-45	8.46675e-45
CHST7	3.73757	1.16967	-2.5679	5.28181e-47	3.5198e-46
KRT13	2.07337	0.43697	-1.6364	1.7777e-37	4.60575e-37
IGHV3-15	0.654204	2.81073	2.15653	4.47995e-17	6.61366e-17
UBTD1	2.15999	4.63219	2.4722	3.95901e-48	5.10444e-47
MT1DP	0.116307	2.13258	2.01627	3.0389e-41	9.61508e-41
RPL23AP65	1.29974	2.37373	1.07399	6.05569e-28	1.13749e-27
LAG3	3.2912	1.75972	-1.53148	3.40318e-33	7.46225e-33
GDE1	3.04068	4.47585	1.43517	3.38651e-47	2.41815e-46
MIR221	0.0459848	1.07553	1.02954	7.13009e-37	1.80133e-36
AC063961.1	0	2.31336	2.31336	1.49198e-47	1.23419e-46
TMEM218	3.47779	2.12676	-1.35104	3.93121e-46	2.10429e-45
FERMT3	1.71725	2.82157	1.10432	1.11129e-24	1.93158e-24
LINC01532	0.194739	1.43557	1.24084	1.51163e-23	2.56293e-23
FBXO32	4.58017	3.53154	-1.04863	3.18419e-12	4.26771e-12
ZNF672	2.46113	4.09506	1.63393	1.41512e-47	1.18377e-46
SASS6	1.03174	2.06647	1.03473	8.55415e-46	4.27574e-45
AC107959.1	1.63043	0.479934	-1.15049	1.5287e-44	6.3781e-44
CEACAM19	2.42272	1.23752	-1.1852	2.20088e-36	5.44839e-36
BUD23	4.79516	3.78818	-1.00698	2.79565e-44	1.13187e-43
AC025154.2	0.0127455	2.05772	2.04497	2.38183e-48	4.59288e-47
NGDN	4.63062	2.88332	-1.7473	4.25679e-47	2.94663e-46
RARG	3.4585	4.48795	1.02944	7.24824e-31	1.4761e-30
SLC22A5	2.3312	1.25129	-1.07991	2.32444e-44	9.50607e-44
PREX1	1.39733	2.76679	1.36946	1.49496e-37	3.88303e-37
LUC7L2	5.12741	3.20431	-1.92309	2.08129e-48	4.59288e-47
BYSL	2.46358	3.69087	1.22729	8.49774e-43	3.00045e-42
MIA	1.6352	0.316521	-1.31868	1.33264e-39	3.82262e-39
NR2C2AP	3.12789	4.24972	1.12183	7.40971e-38	1.95916e-37
SCAMP2	3.96374	5.00133	1.0376	1.08992e-38	2.99506e-38
RERG	3.43675	2.23394	-1.20281	5.80223e-17	8.54942e-17
GOLT1B	2.70313	4.04055	1.33741	3.04699e-44	1.23041e-43
NEXN	2.6374	1.43046	-1.20694	1.50879e-25	2.67072e-25
MAP7	0.82431	2.94671	2.1224	1.39961e-46	8.32372e-46
NOP10	4.78343	7.05775	2.27433	4.44173e-48	5.37876e-47
TESMIN	0.841663	2.38262	1.54096	1.94295e-46	1.11828e-45
TMEM30B	0.94334	3.70772	2.76438	2.34716e-46	1.32388e-45
N4BP3	0.482182	1.83262	1.35044	4.929e-43	1.78163e-42
PAX8-AS1	2.46373	0.725914	-1.73782	3.24468e-33	7.12395e-33
SEMA5B	0.807007	1.81172	1.00472	2.62846e-13	3.60639e-13
TMEM33	1.8641	3.31699	1.45289	1.07535e-47	9.56384e-47
WDR5B	1.19096	2.71736	1.52641	5.45625e-48	6.05577e-47
SCCPDH	2.99175	4.3397	1.34794	4.68666e-46	2.46541e-45
ZNF865	2.48297	3.77346	1.29049	4.56993e-44	1.80841e-43
SMTNL2	1.95094	0.554433	-1.39651	8.21333e-34	1.84005e-33
SAA1	1.18281	3.18017	1.99736	5.51254e-20	8.62971e-20
DCUN1D5	2.65611	4.23512	1.57901	3.10148e-48	4.67701e-47
ITPKB	2.25488	3.30234	1.04747	9.41639e-35	2.17894e-34
ARMC6	2.61402	3.66251	1.04849	2.09925e-42	7.18551e-42
SNAP25	2.77722	1.23113	-1.54608	4.41492e-29	8.55494e-29
ACLY	3.2924	4.38409	1.09169	6.55952e-34	1.47524e-33
GREB1	6.38191	1.99826	-4.38366	1.22935e-45	5.98223e-45
AC138207.5	0.154695	1.52741	1.37272	1.93562e-46	1.11544e-45
RHOT2	5.93202	3.86912	-2.06289	2.94594e-48	4.62293e-47
HSP90AB1	8.25608	9.28012	1.02404	5.62655e-32	1.1828e-31
TMEM185B	1.82457	4.57484	2.75027	2.05462e-48	4.59288e-47
AC073569.2	0.119618	1.38299	1.26337	1.53793e-46	9.07377e-46
CACNB2	2.69281	0.282277	-2.41053	2.13567e-48	4.59288e-47
GLTP	3.0894	4.31779	1.22839	1.2316e-43	4.67455e-43
RPL22	8.19518	5.86678	-2.3284	5.7044e-48	6.22326e-47
PWWP3B	5.36565	0.725897	-4.63975	1.55724e-47	1.27463e-46
SNX14	4.30354	2.76082	-1.54272	8.01276e-48	7.74193e-47
RPL39P3	7.82398	5.82116	-2.00282	1.79254e-39	5.11026e-39
STAR	7.70583	0.790819	-6.91501	1.28571e-47	1.09598e-46
CDH23	4.2212	0.862893	-3.35831	1.08711e-46	6.63736e-46
CBWD1	3.42945	0.974597	-2.45485	2.05468e-48	4.59288e-47
LINC00853	0.0976574	1.14843	1.05077	4.85375e-44	1.91379e-43
VWCE	3.40305	1.78064	-1.62241	7.90208e-28	1.48056e-27
CCDC180	2.37922	0.134617	-2.24461	2.08135e-48	4.59288e-47
AL157392.3	3.46307	0.653099	-2.80997	2.55739e-48	4.59288e-47
AL355338.1	1.06427	2.93387	1.8696	2.65799e-48	4.59288e-47
ITSN1	3.47285	1.66199	-1.81086	2.16328e-48	4.59288e-47
IFT27	3.66041	1.88184	-1.77857	3.76076e-48	4.95607e-47
WRB	3.81485	2.67909	-1.13576	6.35656e-43	2.27116e-42
C22orf39	3.4989	1.99062	-1.50828	8.99226e-47	5.62712e-46
STAG3L1	2.74987	0.434134	-2.31574	2.05468e-48	4.59288e-47
LRG1	0.851703	2.59869	1.74699	1.55732e-23	2.63943e-23
ABCA10	4.54185	0.116585	-4.42526	2.08126e-48	4.59288e-47
TTC4	2.99553	1.0924	-1.90313	2.05471e-48	4.59288e-47
HSD17B10	4.96292	6.13031	1.16739	6.21354e-38	1.65058e-37
HPS6	1.65964	3.41731	1.75768	3.14159e-48	4.67701e-47
ZNF213-AS1	3.54906	2.00233	-1.54673	9.57374e-46	4.73959e-45
AL353813.1	3.38443	0	-3.38443	6.91385e-102	4.94062e-99
BANF1	6.27778	7.36887	1.09109	6.95893e-42	2.29726e-41
ABCA5	3.13111	0.615605	-2.5155	2.05471e-48	4.59288e-47
ITSN2	3.37531	2.11683	-1.25848	1.67958e-45	7.99157e-45
PARP4	2.86134	4.12886	1.26751	7.80823e-43	2.7691e-42
PSMA2	4.86749	3.08492	-1.78257	6.76516e-44	2.62401e-43
RPS7P10	1.22412	2.59547	1.37136	1.59098e-38	4.34116e-38
MMP2	6.87286	5.30546	-1.5674	1.72692e-20	2.73502e-20
CHAF1B	0.866909	2.05698	1.19007	9.455e-46	4.68939e-45
ATF5	2.73126	4.85878	2.12753	7.69048e-46	3.8837e-45
SLCO4A1	2.23951	0.982676	-1.25683	5.30162e-18	7.97496e-18
CES4A	3.36007	0.599948	-2.76013	6.28263e-48	6.60583e-47
AL354740.1	3.19811	0.0682328	-3.12987	2.05471e-48	4.59288e-47
IFT81	3.05077	1.71022	-1.34055	1.72935e-44	7.17981e-44
AKT2	5.8105	3.83348	-1.97702	2.90071e-44	1.17387e-43
PRKAR2B	3.51405	2.3024	-1.21165	1.89839e-27	3.51963e-27
MIR3188	0	1.08034	1.08034	9.35836e-42	3.06217e-41
MN1	2.23268	1.19633	-1.03635	7.21452e-23	1.20495e-22
DDIAS	0.291673	1.73884	1.44716	5.18361e-48	5.87234e-47
ACAP3	4.96744	2.22912	-2.73832	2.30715e-48	4.59288e-47
HCCS	2.14611	3.58778	1.44167	7.64262e-46	3.86058e-45
MTMR11	4.5432	1.95042	-2.59278	6.44514e-48	6.71258e-47
TCEAL3	6.12526	3.55305	-2.57221	5.45619e-48	6.05577e-47
CMTM8	0.750993	4.32586	3.57487	2.08127e-48	4.59288e-47
NEK3	2.97941	1.43517	-1.54424	7.25109e-47	4.6649e-46
PCF11	4.72011	2.52661	-2.1935	2.05468e-48	4.59288e-47
ARPC1B	3.96566	5.73338	1.76771	3.32717e-37	8.51924e-37
GARNL3	2.85609	0.651872	-2.20422	2.05473e-48	4.59288e-47
PFN1P1	0.253616	2.68479	2.43118	2.79098e-48	4.59288e-47
NDC80	0.433732	2.46763	2.0339	1.46108e-47	1.21318e-46
AL133260.1	1.07811	2.54452	1.46641	7.66242e-42	2.52099e-41
SEC61A1	5.14496	6.26662	1.12166	2.70142e-42	9.18552e-42
AC126755.1	4.95288	0.567904	-4.38498	2.05467e-48	4.59288e-47
STEAP1	1.97856	3.08305	1.10449	6.05176e-20	9.46588e-20
SERTAD1	1.92606	3.17761	1.25155	1.31277e-37	3.42411e-37
AC010343.1	2.41712	5.03448	2.61735	2.83444e-48	4.61154e-47
FHOD1	4.36749	2.37947	-1.98802	7.00118e-46	3.56077e-45
ENTPD7	0.74148	1.75356	1.01208	1.62907e-40	4.93039e-40
IFI27L1	3.94665	2.49963	-1.44702	5.33076e-38	1.42034e-37
RGPD6	3.1739	0.0109581	-3.16294	1.99125e-48	4.59288e-47
RCOR1	2.34539	3.37037	1.02498	7.05982e-41	2.18498e-40
FBN1	4.85319	1.81501	-3.03818	1.23355e-46	7.4289e-46
METTL18	1.69328	3.01017	1.31689	1.33063e-46	7.9519e-46
RP2	1.38574	2.60677	1.22103	8.88141e-46	4.42628e-45
PIP4K2C	2.92494	4.57267	1.64773	9.10626e-48	8.46821e-47
ZNF787	2.90372	4.37734	1.47362	1.18764e-46	7.1828e-46
RPL17P50	0.735347	1.87559	1.14024	3.70392e-38	9.93439e-38
GSKIP	1.47831	2.78537	1.30706	3.41579e-45	1.54938e-44
RIOX1	1.3565	2.83147	1.47497	3.2234e-48	4.7157e-47
NSUN5P1	4.49706	2.58657	-1.9105	2.87091e-46	1.58275e-45
MIPEPP3	0.697038	2.06163	1.36459	5.08431e-47	3.41283e-46
MARK2	2.69152	4.35573	1.66421	7.91056e-48	7.67522e-47
FOXA2	0.0437583	1.66489	1.62113	1.20218e-40	3.67297e-40
CCDC34	1.82796	2.91961	1.09165	2.57441e-35	6.10154e-35
HLA-B	7.07847	8.42235	1.34388	1.43742e-23	2.438e-23
OPLAH	2.35563	3.35855	1.00292	6.48357e-20	1.01379e-19
INTU	2.72153	0.856405	-1.86512	4.92416e-48	5.73591e-47
PPIAP29	0.809293	3.10299	2.2937	1.29748e-46	7.78108e-46
FXYD3	0.91344	4.278	3.36456	6.88111e-42	2.272e-41
SLC41A3	4.76488	3.47862	-1.28626	4.311e-47	2.97879e-46
USP32P3	1.77548	0.318368	-1.45712	5.58517e-46	2.90196e-45
IFIH1	1.73867	3.10125	1.36258	1.8091e-33	4.00898e-33
ST3GAL1	2.56928	3.59853	1.02925	2.80978e-21	4.52954e-21
SEC11C	3.88985	2.87055	-1.0193	6.98328e-33	1.51444e-32
ITPR3	2.73749	3.81639	1.0789	4.07413e-24	6.99116e-24
TPT1P9	1.37886	3.12838	1.74953	2.50262e-44	1.01787e-43
KRCC1	3.25959	4.58066	1.32107	2.24738e-39	6.37368e-39
EIF6	4.95037	6.55737	1.60699	1.10041e-46	6.71415e-46
TCEA3	5.11852	3.96958	-1.14894	1.81809e-22	3.01458e-22
ATXN7L3B	2.99649	4.54809	1.5516	8.93517e-47	5.59722e-46
FBXL16	0.370468	2.42455	2.05408	3.53132e-44	1.41367e-43
GATM	4.99689	1.66273	-3.33416	5.65756e-46	2.9353e-45
LONP2	4.46362	3.09697	-1.36666	8.93082e-45	3.83296e-44
PYCR3	1.85937	3.8293	1.96993	4.4502e-47	3.05318e-46
LRRTM1	0.274965	3.24055	2.96559	3.1968e-42	1.0795e-41
SFRP2	0.898087	3.60052	2.70243	6.83953e-21	1.09507e-20
KREMEN1	3.05629	0	-3.05629	6.91405e-102	4.94062e-99
DPH7	4.63887	2.77421	-1.86466	1.83817e-47	1.46072e-46
MEIS3	3.39727	1.08939	-2.30787	4.71799e-45	2.09202e-44
TSTA3	3.72628	5.40974	1.68346	6.33285e-46	3.24507e-45
TSN	3.37326	4.47264	1.09938	8.99287e-46	4.47479e-45
EIF4EBP1	3.67196	6.03481	2.36285	1.75618e-46	1.0211e-45
SMDT1	5.81975	4.59048	-1.22927	4.6013e-33	1.00361e-32
FEN1	1.42463	3.86554	2.44091	2.65801e-48	4.59288e-47
RASGRF2	2.73362	0.614947	-2.11867	1.77883e-46	1.03278e-45
SRRM3	2.23928	0.509233	-1.73005	5.69883e-44	2.22856e-43
INSR	4.02526	2.81613	-1.20913	1.07256e-34	2.47699e-34
CADM1	1.88844	2.96056	1.07212	1.86178e-29	3.6522e-29
SERF2	7.8385	6.0432	-1.79529	4.55678e-48	5.46624e-47
KCTD5	2.39855	3.49373	1.09518	3.84534e-47	2.6961e-46
MIR4728	0	1.12201	1.12201	3.0432e-38	8.19657e-38
AC021054.1	1.29739	2.52168	1.22429	9.69129e-36	2.33231e-35
ACAT1	4.74022	2.8919	-1.84832	2.88976e-48	4.61847e-47
ASB3	2.49001	0.758836	-1.73117	3.18221e-48	4.70737e-47
PCSK1N	0.925616	4.05157	3.12595	2.8823e-38	7.77667e-38
AC131902.1	1.65689	0.277811	-1.37908	5.83663e-38	1.55245e-37
KALRN	2.06651	0.862174	-1.20434	1.74172e-39	4.96844e-39
PRUNE1	2.81728	4.48633	1.66906	2.39796e-48	4.59288e-47
RPS26P15	0.193723	1.54579	1.35207	3.37771e-43	1.23825e-42
AC007996.1	0.435932	2.5423	2.10637	9.95971e-48	9.00007e-47
SLC25A36	4.69066	3.57514	-1.11552	5.04436e-40	1.47991e-39
DNAJB6	5.17522	3.0072	-2.16802	2.05463e-48	4.59288e-47
SNORA7B	0.193868	1.74563	1.55177	7.57025e-36	1.83135e-35
MT-TY	0	5.51173	5.51173	9.9684e-49	4.59288e-47
TDGF1	2.23004	0.212449	-2.0176	1.61776e-45	7.71969e-45
TSPAN12	0.850683	3.46436	2.61368	8.12628e-47	5.13722e-46
CACNA1C	1.37813	0.355892	-1.02224	4.31464e-42	1.4441e-41
NPTXR	1.96771	3.01585	1.04814	6.09974e-22	9.98658e-22
RFK	2.24263	3.5668	1.32417	8.13934e-45	3.51105e-44
RNVU1-18	2.21263	1.00676	-1.20587	1.96752e-22	3.26031e-22
ARNTL2	0.266291	1.45532	1.18903	1.9531e-42	6.6962e-42
PGD	4.17306	5.34056	1.16749	1.57285e-37	4.08185e-37
GULP1	3.05213	0.804493	-2.24763	7.23318e-48	7.2289e-47
TMED3	4.01336	2.74277	-1.27059	3.25325e-41	1.02706e-40
RAD51AP1	0.63055	3.14706	2.51651	2.30721e-48	4.59288e-47
SLC50A1	3.18446	5.24802	2.06356	3.48154e-48	4.78118e-47
PAXIP1-AS1	2.14882	3.19058	1.04176	9.43858e-34	2.10921e-33
ARHGEF25	5.02687	2.5961	-2.43077	1.26505e-46	7.59914e-46
MTND4LP30	0.153024	2.24951	2.09649	1.80234e-48	4.59288e-47
MAL	1.1714	4.93312	3.76173	1.00624e-37	2.64054e-37
STMP1	2.90345	4.81702	1.91357	1.6388e-47	1.3279e-46
NDUFA11	6.5917	3.32669	-3.26501	2.05469e-48	4.59288e-47
RAPGEF4	2.42774	0.533821	-1.89392	4.33132e-48	5.30822e-47
RGL2	5.35784	4.2094	-1.14844	2.05057e-37	5.29795e-37
UBA52P6	0.111187	1.21509	1.1039	1.05319e-46	6.45358e-46
ZHX3	2.82159	1.42387	-1.39772	6.84835e-44	2.65517e-43
TIA1	5.77465	3.88188	-1.89277	5.38036e-46	2.80023e-45
MTCO1P53	0.00692302	1.4839	1.47698	1.09597e-48	4.59288e-47
C1orf194	0.272859	1.72985	1.45699	1.13604e-30	2.30219e-30
PLPP7	2.24083	0.608226	-1.63261	9.64648e-44	3.69454e-43
AC138969.1	7.13431	0.132044	-7.00226	2.05447e-48	4.59288e-47
LCN6	2.49053	0.0775555	-2.41298	2.09339e-48	4.59288e-47
SLC35A2	2.36101	4.38027	2.01926	3.57227e-48	4.83771e-47
ZNF33B	3.25948	2.24179	-1.01769	8.91909e-35	2.06618e-34
XIST	7.53334	1.65006	-5.88328	2.0546e-48	4.59288e-47
COL6A2	8.12617	6.2089	-1.91727	3.34661e-31	6.881e-31
KRT80	0.25779	2.95818	2.7004	2.06936e-46	1.18479e-45
RCC2	3.26553	6.01973	2.7542	2.0545e-48	4.59288e-47
LAMA4	3.37259	1.98805	-1.38454	8.12631e-34	1.82077e-33
AL591845.1	3.04763	1.62895	-1.41867	3.03685e-36	7.48e-36
CD3D	0.531368	1.56563	1.03426	9.30565e-19	1.42144e-18
SOX15	2.86378	1.53236	-1.33142	5.62537e-23	9.42075e-23
RPSAP8	0.0544628	1.14696	1.0925	3.78826e-47	2.66095e-46
SH3D19	4.44298	2.65619	-1.78679	4.68689e-46	2.46541e-45
YRDC	2.01016	3.6206	1.61044	3.74907e-47	2.63541e-46
TET3	0.901187	2.1673	1.26611	4.8969e-45	2.16566e-44
LGR6	0.900503	3.66671	2.76621	1.21987e-36	3.05034e-36
ZBTB17	4.09266	2.92543	-1.16723	1.44606e-45	6.96746e-45
CCDC120	2.24114	3.30954	1.0684	1.05515e-36	2.64627e-36
COX20P1	0.60342	1.97764	1.37422	3.73149e-16	5.40859e-16
RPS19BP1	4.94406	3.39973	-1.54433	1.64912e-46	9.6716e-46
RIC3	4.01752	0.995606	-3.02192	4.71192e-47	3.20435e-46
RNU6-850P	0	1.64807	1.64807	1.37329e-44	5.75556e-44
GPT2	1.18717	3.3426	2.15544	2.3178e-46	1.31048e-45
TXNDC5	4.9205	2.02539	-2.8951	2.52463e-48	4.59288e-47
TMEM14C	5.51748	6.91704	1.39956	9.57008e-46	4.73959e-45
TIMP2	7.93992	5.63372	-2.3062	1.52909e-45	7.33894e-45
FCGR3A	1.44025	3.84983	2.40958	1.54159e-36	3.84136e-36
AC012618.1	0.118093	2.89428	2.77618	1.73999e-48	4.59288e-47
GAS5	8.47994	6.17407	-2.30586	1.91375e-45	9.03342e-45
AC118553.1	0.388799	1.40243	1.01363	2.69623e-45	1.24363e-44
CNKSR1	1.854	3.65193	1.79793	9.29884e-44	3.5659e-43
SH3BP5-AS1	3.97568	1.27611	-2.69957	2.90843e-48	4.61847e-47
C1QTNF7	1.88231	0.594246	-1.28806	5.28881e-42	1.75938e-41
REEP4	2.37609	4.09657	1.72048	1.04497e-45	5.14438e-45
AC092295.2	0.564213	1.62907	1.06486	1.63039e-42	5.62509e-42
TUT4	4.95467	1.86646	-3.08821	2.05472e-48	4.59288e-47
MATN1-AS1	1.94155	0.55579	-1.38576	4.36636e-47	3.00677e-46
TRAF7	3.49641	5.07837	1.58196	6.98041e-47	4.50461e-46
BOP1	3.05198	4.8773	1.82532	6.29343e-46	3.22821e-45
LINC01515	2.18091	0.436018	-1.74489	1.76557e-45	8.3702e-45
ATP13A2	2.62061	4.04165	1.42104	1.44606e-45	6.96746e-45
RBBP8NL	0.044064	2.07912	2.03506	8.27968e-47	5.22514e-46
SH3BP5	5.60396	1.9629	-3.64106	2.08135e-48	4.59288e-47
PRICKLE4	1.3896	0.295474	-1.09413	4.83302e-47	3.27114e-46
PHLDB2	2.50481	0.833473	-1.67134	1.32833e-42	4.6155e-42
LTO1	3.41002	1.59687	-1.81314	1.30243e-47	1.10549e-46
TES	1.79075	4.4373	2.64655	3.04689e-42	1.03115e-41
AP002026.1	1.43558	0.352064	-1.08351	8.65745e-47	5.43769e-46
IGLV3-27	0.202323	1.24739	1.04507	3.37413e-14	4.71373e-14
MMP7	0.269286	5.34042	5.07114	1.88592e-47	1.49036e-46
PAK1IP1	2.14606	4.17328	2.02722	4.3871e-48	5.34563e-47
CLEC2D	2.40549	1.20928	-1.19621	1.98155e-43	7.38675e-43
RPL21P75	0.761194	1.9954	1.2342	1.29043e-28	2.46858e-28
CRELD2	3.73726	2.49981	-1.23745	3.87289e-37	9.88792e-37
TCF21	3.83883	0.7968	-3.04203	4.68692e-46	2.46541e-45
AC009120.2	3.34759	1.14759	-2.20001	3.35017e-48	4.76232e-47
LRRK2	1.97149	0.307215	-1.66427	2.96327e-47	2.15816e-46
CDS1	1.44246	2.99025	1.5478	1.02544e-43	3.92088e-43
CAMTA2	4.54098	3.08827	-1.45271	1.17269e-46	7.10416e-46
AP002387.2	2.0755	3.42522	1.34972	7.08578e-26	1.26535e-25
SPC24	0.429193	3.22259	2.7934	3.22344e-48	4.7157e-47
ALDH2	5.62069	2.91164	-2.70905	7.233e-48	7.2289e-47
RPL37A	11.4803	7.98217	-3.49815	2.04665e-48	4.59288e-47
CA5B	2.06041	0.825049	-1.23537	2.29385e-45	1.06918e-44
CCDC68	2.67822	0.45184	-2.22638	2.40209e-47	1.81564e-46
SENP7	3.49596	1.90634	-1.58962	3.17797e-47	2.29212e-46
CAPN9	0.244746	1.42069	1.17595	1.03786e-33	2.31592e-33
POLE	3.27117	2.0271	-1.24408	1.96437e-41	6.30003e-41
AC245100.8	1.17459	2.97508	1.80049	6.3333e-46	3.24507e-45
WNT2B	2.41722	0.579953	-1.83727	6.91878e-43	2.46394e-42
AL670729.1	0.0674724	2.30764	2.24016	1.64553e-48	4.59288e-47
SLC16A13	0.529691	1.76502	1.23533	2.88792e-45	1.32677e-44
AC024075.3	2.31264	1.18104	-1.1316	8.71348e-39	2.40797e-38
MTMR9LP	4.50415	1.28378	-3.22037	3.26513e-48	4.72097e-47
PYROXD2	3.10331	1.80371	-1.2996	1.26184e-37	3.2945e-37
AC002075.2	0.62451	2.10413	1.47962	4.64038e-42	1.55088e-41
PIK3C3	3.74817	1.49857	-2.2496	2.24846e-48	4.59288e-47
IGF1	1.898	0.872315	-1.02568	6.78722e-23	1.1345e-22
PENK	3.12291	0.234935	-2.88798	7.22763e-44	2.79813e-43
LAMB2	7.83608	5.16368	-2.6724	2.05433e-48	4.59288e-47
CAMK2N2	0.128229	1.40722	1.27899	5.35246e-45	2.35704e-44
OASL	0.293458	2.48331	2.18986	4.24556e-44	1.68471e-43
NCK1-DT	0.878572	2.47783	1.59926	5.31808e-48	5.95586e-47
FAM160B2	5.24938	2.73725	-2.51213	2.05472e-48	4.59288e-47
CNTRL	2.5189	1.42	-1.0989	5.29467e-44	2.08058e-43
AL022718.1	0	4.65992	4.65992	9.9686e-49	4.59288e-47
HSD17B8	2.12743	3.98824	1.86081	1.0296e-44	4.38042e-44
FAM136A	2.71655	4.79629	2.07973	2.0546e-48	4.59288e-47
DNAJC12	2.51174	0.973407	-1.53834	3.48075e-37	8.90291e-37
HCST	1.80725	3.58517	1.77792	1.26136e-36	3.152e-36
FARSA	3.5626	5.38501	1.82241	1.03483e-47	9.27532e-47
SLC16A4	2.73638	1.4323	-1.30409	3.31854e-36	8.16311e-36
ABHD17C	1.02562	3.26848	2.24286	7.25132e-47	4.6649e-46
ASCL2	0.17914	1.93021	1.75107	6.54754e-47	4.25499e-46
SMG1P7	2.4313	0.422073	-2.00922	3.61869e-48	4.85777e-47
SYCE3	0.0622114	1.1822	1.11999	3.07071e-43	1.12838e-42
FHDC1	0.385576	1.93654	1.55096	5.2152e-47	3.4804e-46
TEC	0.638416	1.75138	1.11296	4.14751e-41	1.30207e-40
LINGO1	1.02173	3.10888	2.08714	7.24361e-38	1.91736e-37
FAM84B	1.52675	4.17721	2.65046	1.02175e-47	9.19275e-47
CLDN7	0.886855	6.16279	5.27594	5.28096e-47	3.5198e-46
YWHAB	4.92169	6.81268	1.891	4.2195e-48	5.2569e-47
LONRF1	4.04542	2.13264	-1.91278	1.33459e-44	5.6112e-44
GNL3L	1.32305	3.12258	1.79953	2.05468e-48	4.59288e-47
WAS	1.1073	2.52611	1.41881	3.22873e-34	7.33871e-34
AL513008.1	0.0239026	1.07987	1.05597	3.4453e-43	1.26153e-42
PRDM8	1.84514	0.294347	-1.5508	4.3873e-48	5.34563e-47
C6orf106	3.39009	4.66812	1.27803	4.24534e-44	1.68471e-43
ACTBP2	0.135194	1.61367	1.47848	2.09066e-48	4.59288e-47
ZNF337	3.75119	0.865854	-2.88534	2.05467e-48	4.59288e-47
ERH	5.20528	6.47407	1.26879	2.56526e-45	1.18735e-44
FAN1	2.96993	1.58974	-1.38019	3.94439e-47	2.75301e-46
SNORD60	0	1.70441	1.70441	2.13467e-46	1.21844e-45
EFNB3	1.37349	2.43389	1.06039	2.41361e-16	3.51265e-16
PRKCQ	0.593533	2.31148	1.71795	2.26549e-43	8.41138e-43
SGPP2	0.447624	3.66831	3.22069	2.19717e-47	1.68549e-46
AZIN2	2.32251	0.837419	-1.48509	3.55513e-46	1.92071e-45
LARGE2	1.58627	4.43371	2.84745	1.26508e-46	7.59914e-46
SP1	3.23691	4.31941	1.0825	4.74114e-44	1.87138e-43
MT1X	5.80154	4.27341	-1.52813	2.15493e-15	3.08067e-15
EIF4E	3.42086	1.68643	-1.73443	2.69237e-48	4.59288e-47
MIR3197	0	1.18724	1.18724	1.20455e-37	3.14669e-37
PPP4R3A	4.55984	3.48579	-1.07405	9.58754e-44	3.67423e-43
MIR320E	0.160104	2.03836	1.87826	1.21472e-40	3.70885e-40
CBX7	4.86244	1.6165	-3.24594	2.16338e-48	4.59288e-47
DIAPH3	0.1471	1.36191	1.21481	1.9911e-46	1.1433e-45
SLFN11	3.56196	2.37461	-1.18736	3.62649e-33	7.94347e-33
RAD51D	2.20919	0.866249	-1.34294	8.32652e-48	7.96618e-47
VPREB3	0.127552	1.24292	1.11537	5.62208e-42	1.86823e-41
CCDC84	4.03294	2.16011	-1.87283	3.76085e-48	4.95607e-47
RUFY2	2.93364	1.60875	-1.32489	3.71272e-48	4.9272e-47
IFRD1	4.32296	2.6363	-1.68666	1.01917e-45	5.02798e-45
PLK1	1.16541	3.80642	2.64102	1.57734e-47	1.28704e-46
CHMP4B	5.40792	6.89921	1.49129	8.21675e-48	7.89747e-47
AC009955.4	3.17581	0.588054	-2.58775	1.89396e-46	1.09281e-45
MBD1	4.59917	3.21181	-1.38736	4.38708e-48	5.34563e-47
SNHG8	7.27812	5.80408	-1.47404	1.91773e-33	4.24464e-33
HERPUD1	6.31541	4.42956	-1.88586	3.05702e-46	1.67558e-45
HPDL	0.509895	2.56835	2.05846	7.53194e-47	4.8121e-46
IGHJ3	0	1.4289	1.4289	2.82027e-23	4.75091e-23
RPAP2	2.48142	1.42355	-1.05788	5.62761e-47	3.72355e-46
RAB7A	5.76569	7.23776	1.47208	2.72621e-47	2.01456e-46
AC139887.1	0.386816	1.44236	1.05554	4.40058e-36	1.07633e-35
TSHZ3	3.78182	1.34319	-2.43863	5.4867e-47	3.64459e-46
RPL37P23	0.875705	2.80845	1.93275	5.94555e-46	3.06989e-45
THAP9-AS1	4.10023	2.99973	-1.1005	8.52436e-40	2.46804e-39
OGG1	3.85194	2.10004	-1.75189	2.87129e-48	4.61847e-47
ZNHIT2	2.14865	4.2803	2.13164	4.2213e-48	5.2569e-47
AC016747.1	1.12699	2.77887	1.65188	3.21653e-39	9.05051e-39
HDDC2	4.68269	3.11004	-1.57265	8.99341e-46	4.47479e-45
NBPF8	3.17276	0.784799	-2.38796	2.16332e-48	4.59288e-47
MSC-AS1	1.81007	0.48218	-1.32789	1.10888e-44	4.70362e-44
MRPS10	2.67895	4.78216	2.10321	2.46028e-48	4.59288e-47
FKBP5	5.34758	2.37318	-2.97439	2.15782e-43	8.02284e-43
FOXL2NB	4.79169	0.405904	-4.38579	9.60839e-47	5.95048e-46
L1CAM	0.755342	2.93595	2.18061	1.01719e-33	2.27062e-33
TNFSF10	3.33967	5.08404	1.74437	4.61205e-25	8.07837e-25
KRT14	0.985494	1.99735	1.01186	2.62207e-06	3.11699e-06
CASP3	2.01485	3.52198	1.50713	9.46286e-48	8.68645e-47
COMT	5.96026	4.1814	-1.77886	1.10314e-47	9.76035e-47
AMDHD2	3.23729	2.00161	-1.23569	1.22407e-44	5.16634e-44
C11orf96	7.69322	2.74845	-4.94477	7.05007e-48	7.12257e-47
PAPSS1	3.11759	4.33131	1.21372	2.00574e-43	7.47384e-43
NOTUM	0.0605445	1.46733	1.40678	2.43437e-43	9.00959e-43
RHOBTB3	4.84587	1.66381	-3.18206	3.84556e-47	2.6961e-46
C9orf40	1.19906	2.2246	1.02554	7.10191e-41	2.19764e-40
PTMAP2	1.38462	3.92367	2.53905	2.27762e-48	4.59288e-47
AP001107.4	2.23546	0.779869	-1.4556	7.17376e-43	2.55207e-42
DPF3	2.4055	0.59801	-1.80749	1.42798e-42	4.95064e-42
AGAP5	2.16793	0.175984	-1.99195	2.05468e-48	4.59288e-47
SLC2A3	3.62749	2.43548	-1.19201	3.33654e-16	4.84256e-16
ZNF471	3.00362	0.978876	-2.02474	7.61321e-48	7.43674e-47
TRIOBP	4.64165	1.72288	-2.91877	2.13556e-48	4.59288e-47
WDFY2	2.37205	1.165	-1.20705	1.17288e-43	4.46262e-43
PSMD6	4.44526	3.02773	-1.41753	6.78425e-48	6.91059e-47
GLUL	8.28845	5.62028	-2.66816	5.66859e-48	6.19341e-47
GOLGA8B	6.05121	1.66092	-4.39029	2.27767e-48	4.59288e-47
NEK9	5.09161	2.50761	-2.584	2.30715e-48	4.59288e-47
KCTD12	3.22741	4.99465	1.76724	1.38129e-37	3.59728e-37
PHLDA3	3.38134	4.72109	1.33975	2.76959e-28	5.24859e-28
ADAMTS9	2.89185	1.53864	-1.35321	1.75718e-25	3.10535e-25
FAM183A	0.461801	1.91634	1.45453	4.44227e-26	7.97266e-26
TUBE1	3.68632	1.40934	-2.27698	2.16336e-48	4.59288e-47
RBM23	4.93869	2.99184	-1.94685	1.10315e-47	9.76035e-47
MFSD6	1.63913	3.17897	1.53984	2.29323e-43	8.50757e-43
ELOVL7	0.335588	1.74694	1.41135	6.28021e-43	2.2456e-42
AL137058.2	1.46924	0.33496	-1.13428	3.61821e-48	4.85777e-47
EGFL6	0.129987	3.34556	3.21557	2.47449e-48	4.59288e-47
C3orf38	1.8009	3.28035	1.47945	2.65789e-48	4.59288e-47
S100A4	3.8137	6.61229	2.79859	3.51884e-34	7.98247e-34
HYAL3	0.869571	2.42616	1.55659	5.05348e-46	2.64108e-45
UNC5A	0.201195	2.36935	2.16816	3.74624e-38	1.00436e-37
STX16-NPEPL1	2.27656	0.304937	-1.97163	3.39354e-48	4.76557e-47
UBXN10-AS1	0.39717	1.42821	1.03104	1.40651e-30	2.84285e-30
GAPDHP63	0.0176832	1.43602	1.41834	1.29096e-48	4.59288e-47
PDLIM1	3.64204	6.13418	2.49214	1.9426e-40	5.85333e-40
WASH2P	3.61611	1.60773	-2.00839	1.37074e-47	1.15131e-46
SBK1	0.428736	3.37688	2.94814	2.94605e-48	4.62293e-47
MTPN	3.925	5.5383	1.61329	5.01966e-47	3.37839e-46
AC090360.1	1.63276	0.364734	-1.26802	1.18765e-46	7.1828e-46
BICDL1	0.711417	1.98962	1.2782	2.68848e-34	6.12574e-34
B4GALT5	3.02582	5.42901	2.40319	3.95876e-48	5.10444e-47
LINC02438	0.00186979	1.19704	1.19517	1.13327e-48	4.59288e-47
SLC35C1	1.91462	3.52356	1.60894	7.61302e-48	7.43674e-47
AL356599.1	1.94233	0.462133	-1.4802	3.02281e-48	4.66065e-47
SPINT1-AS1	0.526977	3.73551	3.20853	3.98012e-46	2.12784e-45
NDUFA6	4.08308	5.26223	1.17915	6.34774e-41	1.97136e-40
CD47	3.68727	5.49036	1.80309	4.2387e-46	2.24951e-45
KCNT1	2.04349	0.775424	-1.26806	2.79695e-30	5.60688e-30
MATN2	5.91907	3.17214	-2.74692	6.38825e-47	4.16154e-46
CUL7	3.2227	4.31084	1.08813	2.73819e-33	6.0276e-33
TTYH2	3.09491	1.18328	-1.91163	1.43722e-44	6.01533e-44
PITPNM2	3.35894	1.31683	-2.04212	9.22283e-47	5.75006e-46
PLIN5	5.5792	0.538544	-5.04066	8.22085e-48	7.89747e-47
TXNRD2	3.48709	2.06817	-1.41892	2.5927e-47	1.93614e-46
EDA2R	1.77042	0.609156	-1.16126	1.06667e-40	3.26809e-40
MAB21L4	0.204458	1.87575	1.67129	7.43441e-40	2.15987e-39
URAHP	2.44622	0.519058	-1.92717	2.39802e-48	4.59288e-47
FAM214A	3.77224	1.82956	-1.94268	4.22149e-48	5.2569e-47
TRPC4AP	4.17259	5.26884	1.09625	9.57294e-46	4.73959e-45
COL18A1	6.96338	5.52667	-1.43671	1.80318e-34	4.13134e-34
CTSS	1.78434	3.96526	2.18093	3.66654e-36	8.99893e-36
RASGEF1A	0.581555	1.75956	1.178	1.40651e-23	2.38601e-23
NASP	5.71397	3.7411	-1.97287	7.51595e-48	7.40046e-47
RF01882	2.72263	0	-2.72263	3.64236e-91	2.18295e-88
DVL2	4.6056	3.325	-1.28059	1.18448e-42	4.13889e-42
VPS13D	3.04179	1.83961	-1.20219	1.41039e-45	6.81323e-45
PUS7	1.73947	2.85998	1.12051	1.40851e-43	5.31801e-43
TMEM69	3.43654	4.69939	1.26285	2.55978e-47	1.91546e-46
GATA6	4.88493	3.41581	-1.46913	4.32485e-21	6.94841e-21
MGAT5	2.08412	3.101	1.01688	6.03084e-35	1.40763e-34
CENPV	3.8242	2.14097	-1.68323	1.47185e-35	3.51619e-35
SLC6A9	1.21186	2.94593	1.73408	3.00109e-39	8.46218e-39
GAPDHP65	0.128424	2.48265	2.35422	2.0375e-48	4.59288e-47
DENND3	3.57447	1.26865	-2.30583	5.67037e-48	6.19341e-47
SUSD3	3.87451	4.88459	1.01008	6.10104e-16	8.80741e-16
ZNF337-AS1	1.77818	0.757955	-1.02022	4.48946e-45	1.99879e-44
TCTE3	2.01617	0.869416	-1.14675	2.46929e-42	8.42241e-42
SNRPGP2	1.1974	3.53515	2.33775	3.85839e-48	5.02747e-47
GTSE1	0.394358	2.25607	1.86171	1.35335e-47	1.13981e-46
KDM7A-DT	0.469539	2.01035	1.54081	2.65956e-47	1.97412e-46
TRIM59	0.703999	1.71244	1.00844	7.63476e-39	2.11523e-38
PDCD2L	1.902	3.42733	1.52533	3.6088e-47	2.55323e-46
BANF1P3	0.254624	2.69384	2.43922	1.95506e-48	4.59288e-47
RANGRF	4.12028	2.50091	-1.61938	1.18412e-45	5.77423e-45
TMSB4XP6	2.96608	0	-2.96608	5.13035e-72	2.80343e-69
CFDP1	5.17446	3.29099	-1.88347	4.01015e-48	5.14547e-47
IMPAD1	2.4911	4.22056	1.72946	4.55907e-48	5.46624e-47
ANKRD35	1.6148	0.488825	-1.12598	1.72168e-39	4.91202e-39
MIR25	0	2.77034	2.77034	1.71884e-48	4.59288e-47
COMMD7	3.80908	5.16754	1.35846	9.10569e-48	8.46821e-47
RIPK2	1.69124	3.53994	1.8487	2.06156e-47	1.60124e-46
NEIL3	0.0689009	1.3913	1.3224	4.11233e-48	5.20387e-47
RNY4P10	0	1.78438	1.78438	4.34847e-47	2.99556e-46
RNU11	0	1.03077	1.03077	1.05536e-43	4.02786e-43
KCNQ1	0.730398	2.33581	1.60541	6.91874e-43	2.46394e-42
RND3	2.11338	3.72285	1.60947	3.24571e-36	7.98807e-36
MGST1	1.90284	3.07625	1.1734	3.81565e-16	5.52971e-16
AC024940.3	0.339885	2.11115	1.77126	3.14149e-48	4.67701e-47
ELOVL3	0.173473	1.23724	1.06377	8.0742e-36	1.95148e-35
HECTD2	2.63585	1.0603	-1.57555	2.13567e-48	4.59288e-47
AP001318.2	0.615279	1.70934	1.09407	1.45484e-44	6.08585e-44
RAB32	2.56465	4.54359	1.97894	2.64531e-46	1.47368e-45
KRT8P45	0.0730252	1.73072	1.6577	4.26897e-48	5.27532e-47
NBDY	3.39157	5.48406	2.0925	6.63514e-47	4.30458e-46
AL031714.1	2.3995	0.820992	-1.57851	3.05909e-47	2.21838e-46
PQLC3	3.33712	4.45877	1.12165	1.42086e-37	3.6967e-37
COL14A1	4.92855	1.76799	-3.16057	3.6803e-45	1.65882e-44
HIST1H3E	0.497419	1.89303	1.39561	3.05734e-34	6.95086e-34
FTL	9.13858	11.6043	2.46575	2.29711e-48	4.59288e-47
LRRC42	3.00132	4.46689	1.46556	3.84527e-47	2.6961e-46
CD302	3.17983	0.953081	-2.22674	1.10321e-47	9.76035e-47
PPT2	4.59289	2.35423	-2.23866	2.7273e-48	4.59288e-47
KCNJ8	2.89421	1.74786	-1.14636	8.54316e-30	1.68981e-29
DPH3	1.85318	3.1389	1.28573	3.58993e-45	1.62006e-44
DFFA	2.45236	3.8563	1.40394	8.54203e-48	8.11008e-47
HLA-DMA	2.84214	5.31136	2.46922	9.44261e-39	2.60443e-38
PLD1	3.37472	0.829643	-2.54508	1.3025e-47	1.10549e-46
ZNF665	2.25272	0.705016	-1.5477	3.26516e-48	4.72097e-47
SSNA1	4.14091	5.54821	1.4073	6.22793e-47	4.06709e-46
PTPRN2	1.7963	0.781009	-1.01529	2.2953e-37	5.91709e-37
COL6A3	6.26329	3.84369	-2.41961	1.41287e-37	3.67696e-37
SEMA6D	2.69801	1.58392	-1.11409	4.46059e-31	9.14313e-31
FOPNL	3.13582	4.30415	1.16834	2.98125e-46	1.63831e-45
DST	6.1129	0.885923	-5.22698	2.05465e-48	4.59288e-47
DNHD1	2.66277	0.727026	-1.93575	3.85875e-48	5.02747e-47
RBM3	6.16965	5.16628	-1.00337	5.36284e-25	9.38372e-25
XPR1	1.79325	4.55711	2.76385	2.05468e-48	4.59288e-47
PIP5K1A	3.63495	4.69456	1.05961	8.54896e-43	3.01739e-42
ACTG1	9.07529	10.4779	1.40262	6.74129e-43	2.40673e-42
AC125494.1	2.93096	0.130008	-2.80096	2.05317e-48	4.59288e-47
RANP4	1.65539	0.511675	-1.14371	4.01026e-43	1.46077e-42
FAM171A1	2.55438	4.2463	1.69192	1.96754e-46	1.1307e-45
FAHD2A	3.79429	2.2812	-1.51309	1.08917e-47	9.66366e-47
ADORA1	0.303467	1.73496	1.43149	5.69886e-44	2.22856e-43
COA6	2.8763	4.63223	1.75593	2.06154e-47	1.60124e-46
AC080038.1	5.25691	3.97293	-1.28399	9.38798e-29	1.80316e-28
FTH1P23	0.809299	2.01163	1.20234	4.26317e-42	1.42791e-41
ABHD17A	4.50475	3.32937	-1.17538	1.6912e-46	9.89704e-46
GASK1B	4.60048	2.0295	-2.57098	7.26939e-46	3.68507e-45
AL121768.1	2.69306	0.0504325	-2.64263	2.15411e-48	4.59288e-47
WT1	4.25788	5.69581	1.43793	3.46366e-29	6.73414e-29
MGME1	1.82534	3.93019	2.10484	2.79824e-48	4.59288e-47
UPK3BL1	4.34447	0.802501	-3.54197	7.87352e-46	3.96751e-45
RPS27P21	0.107678	3.26131	3.15363	1.42953e-48	4.59288e-47
PPP1CA	4.03072	6.61735	2.58664	2.27689e-48	4.59288e-47
RFC3	1.79907	3.62002	1.82094	6.12359e-48	6.50487e-47
RAD51-AS1	3.08042	2.03004	-1.05039	4.3467e-32	9.17698e-32
AC069281.2	3.00138	1.6509	-1.35048	1.06525e-38	2.92986e-38
SMARCC1	2.99298	4.62463	1.63165	1.76905e-47	1.41861e-46
INO80B	4.32699	2.93583	-1.39116	2.06043e-39	5.85422e-39
ARHGAP17	4.09697	2.76093	-1.33603	3.80918e-48	4.98807e-47
ADA2	1.96781	3.97584	2.00803	9.08814e-40	2.62677e-39
TM9SF4	3.80467	5.15465	1.34998	5.77141e-47	3.80426e-46
AL513314.2	2.71505	0.298772	-2.41628	3.43697e-48	4.78118e-47
MRVI1	3.09468	1.34733	-1.74736	8.88389e-38	2.33556e-37
RBPMS	6.8223	2.5836	-4.2387	2.05447e-48	4.59288e-47
ZNF281	1.17459	2.69216	1.51757	2.36736e-48	4.59288e-47
DPY19L2	3.65731	0.4539	-3.20341	2.10837e-48	4.59288e-47
ZNF493	3.15368	1.2792	-1.87448	3.99489e-47	2.78398e-46
PPIL1	2.85918	4.76683	1.90765	2.31188e-47	1.75899e-46
TPRG1L	3.83803	4.8599	1.02187	6.24248e-39	1.73751e-38
HMGB1P6	5.44631	2.17698	-3.26933	1.9925e-46	1.1433e-45
GPX1	5.7888	8.63955	2.85075	2.05019e-48	4.59288e-47
ETFDH	3.23248	1.86319	-1.3693	2.87048e-47	2.09887e-46
AP000251.1	0.0405174	2.32549	2.28497	1.53704e-48	4.59288e-47
EPB41L3	3.07792	0.980664	-2.09726	4.59375e-47	3.13777e-46
DES	5.3345	2.41028	-2.92421	3.57361e-35	8.41925e-35
SCARNA21	0.220619	1.96749	1.74688	4.11841e-37	1.04989e-36
SLC4A3	6.07396	2.50454	-3.56942	6.35345e-45	2.77096e-44
GABPB1-AS1	2.71466	1.39948	-1.31518	1.33982e-38	3.66933e-38
ZNF783	3.4111	2.18348	-1.22762	1.01695e-44	4.3335e-44
BPTF	4.34263	2.80724	-1.5354	2.1148e-47	1.63439e-46
IGSF8	4.13178	5.50159	1.3698	3.50159e-45	1.58413e-44
FOXQ1	0.084109	4.23671	4.1526	1.35515e-47	1.14079e-46
ACTA2	7.5636	5.18215	-2.38145	6.74853e-31	1.3757e-30
HSD11B1	4.2112	1.27058	-2.94062	1.82801e-44	7.56911e-44
ADH1B	5.35426	0.659551	-4.6947	6.39933e-46	3.278e-45
PWP2	1.68287	0.378954	-1.30392	5.63177e-43	2.02111e-42
HES1	3.28169	4.80269	1.52099	2.49792e-23	4.21363e-23
ARL17A	2.7041	0.268237	-2.43586	2.05471e-48	4.59288e-47
HDAC3	4.87256	3.5706	-1.30196	7.23251e-48	7.2289e-47
PRIMA1	1.6373	3.38549	1.74818	1.08426e-34	2.50366e-34
MYH11	5.81596	0.841618	-4.97434	1.57736e-47	1.28704e-46
DOK7	0.381133	3.35889	2.97776	6.30799e-47	4.11503e-46
ZNF280D	4.05943	1.42493	-2.6345	2.05469e-48	4.59288e-47
HIST1H2BJ	0.679989	2.69428	2.01429	7.11652e-40	2.06946e-39
AC093673.1	1.72557	4.02568	2.30011	9.34261e-48	8.61876e-47
AC011498.7	1.65097	0.628785	-1.02219	7.10307e-45	3.07906e-44
DOCK4	2.62417	1.2609	-1.36327	4.04213e-44	1.60914e-43
H1FX	6.27123	7.40663	1.1354	1.28893e-34	2.96889e-34
IGLV2-8	0.730501	2.00043	1.26993	9.4896e-08	1.16152e-07
GSTP1	7.19752	8.74151	1.54399	3.53956e-45	1.60082e-44
ZNF524	2.91995	3.94352	1.02357	2.66023e-35	6.30011e-35
SDC2	5.84107	3.26427	-2.57681	1.92964e-42	6.61728e-42
NAXE	4.46988	6.59437	2.12449	3.14082e-48	4.67701e-47
AC009237.14	0.91844	3.21736	2.29892	3.10148e-48	4.67701e-47
RNU6-37P	0.0146948	1.68642	1.67172	1.06244e-47	9.48087e-47
RPL41P1	0	4.51289	4.51289	9.96879e-49	4.59288e-47
AC138696.2	0.550473	2.56709	2.01661	7.54853e-45	3.26757e-44
MSLN	0.772892	8.21595	7.44306	3.221e-48	4.7157e-47
IGHV1-2	0.506206	2.0416	1.53539	2.47739e-11	3.26112e-11
GPR27	1.52539	3.49772	1.97233	2.00001e-38	5.42851e-38
SNX4	2.7496	4.15219	1.40259	9.16463e-48	8.51603e-47
ASPSCR1	3.42275	2.26288	-1.15987	1.22078e-42	4.25772e-42
HMGB1	6.90647	5.17514	-1.73133	3.43656e-48	4.78118e-47
CCNF	0.723051	2.29689	1.57383	3.71272e-48	4.9272e-47
NPIPP1	4.78326	2.17161	-2.61165	1.0617e-47	9.4788e-47
CD82	2.94177	4.43476	1.49299	6.28321e-31	1.28225e-30
MADD	4.08439	2.60308	-1.48131	9.46286e-48	8.68645e-47
AL589880.1	0.118358	1.55504	1.43668	2.05467e-44	8.4698e-44
FNDC10	0.878494	4.29925	3.42076	4.92416e-48	5.73591e-47
PCP4	0.901276	2.75182	1.85054	2.6964e-13	3.69907e-13
DEPDC1B	0.24136	1.93867	1.69731	1.07533e-47	9.56384e-47
GJB2	0.351699	2.87352	2.52182	3.49089e-40	1.03523e-39
DHPS	5.74049	4.46961	-1.27089	1.051e-39	3.03159e-39
AC132008.2	4.0733	2.85144	-1.22186	6.56066e-37	1.65996e-36
ZCRB1	3.95809	5.21334	1.25525	1.10873e-44	4.70362e-44
BPGM	2.02644	3.37002	1.34358	2.50257e-44	1.01787e-43
MAVS	2.94779	3.98036	1.03257	8.51543e-39	2.35499e-38
RBBP8	1.82224	3.55296	1.73072	4.32519e-45	1.93033e-44
CALCOCO2	5.38758	2.98541	-2.40217	2.94604e-48	4.62293e-47
GPR89B	2.62383	0.929255	-1.69457	2.21974e-48	4.59288e-47
FARSB	2.81353	4.20824	1.39471	7.71072e-48	7.50095e-47
CIPC	2.09011	3.4184	1.32829	5.11723e-46	2.67288e-45
FUK	3.11417	1.80059	-1.31358	9.81644e-46	4.85052e-45
EIF2AK1	3.67003	5.39227	1.72224	2.05446e-48	4.59288e-47
TWIST2	3.8528	1.54039	-2.3124	4.54757e-39	1.2732e-38
RXRA	3.85729	2.61722	-1.24007	6.38585e-41	1.98233e-40
PLP2	5.63589	7.13736	1.50146	5.14877e-35	1.20432e-34
RNA5-8SP2	0	1.34003	1.34003	2.2051e-34	5.04229e-34
CYP4F12	2.38812	0.203624	-2.1845	2.91255e-47	2.12622e-46
BICC1	2.49395	1.30551	-1.18845	3.69857e-32	7.82729e-32
ZNF773	1.85722	0.807498	-1.04972	3.30161e-47	2.36471e-46
RCOR2	0.802689	2.73623	1.93354	1.551e-39	4.43663e-39
EIF3C	7.06724	1.77355	-5.29368	2.05458e-48	4.59288e-47
NRSN2-AS1	1.21794	3.03384	1.8159	4.6183e-48	5.50731e-47
FLCN	4.80942	1.729	-3.08042	2.05459e-48	4.59288e-47
ANKRD37	4.22966	1.56071	-2.66896	3.65493e-47	2.58095e-46
AC104667.2	0.144297	1.33916	1.19486	1.2901e-43	4.8916e-43
PPP1R11	4.18859	5.73246	1.54387	2.05426e-48	4.59288e-47
AL133153.2	0.0036988	1.00511	1.00141	5.21329e-48	5.90236e-47
AC008763.1	0.157147	1.42292	1.26577	3.06451e-44	1.23719e-43
ZNF239	1.29033	2.58712	1.29679	5.01991e-45	2.21589e-44
INAFM2	2.30899	3.56879	1.2598	9.18967e-34	2.05457e-33
CCL5	1.12241	3.83251	2.7101	1.3504e-37	3.51884e-37
AP2A1	5.25216	3.98365	-1.26851	1.09395e-46	6.67692e-46
AK6	3.91672	2.91241	-1.00431	5.28884e-42	1.75938e-41
RNU6-1016P	0	1.58575	1.58575	2.13467e-46	1.21844e-45
ATG16L2	4.59272	1.51984	-3.07287	2.19129e-48	4.59288e-47
POLD4	4.73912	2.94159	-1.79753	6.14971e-47	4.02166e-46
ZNF706	5.10263	3.70472	-1.39791	5.58678e-46	2.90196e-45
CLIC4	4.105	5.30141	1.19641	5.71901e-30	1.13616e-29
YAF2	2.65594	1.44731	-1.20863	1.22188e-47	1.05345e-46
GCSHP5	2.62985	0.721661	-1.90819	2.2254e-47	1.70147e-46
PHF23	3.10217	4.23939	1.13722	3.24996e-45	1.48038e-44
RPUSD1	2.31841	4.30273	1.98432	2.39799e-48	4.59288e-47
CEP63	2.9159	1.57193	-1.34397	2.21973e-48	4.59288e-47
NOSTRIN	3.11026	0.700653	-2.40961	3.90858e-48	5.07459e-47
PDHA1	5.4496	4.26378	-1.18581	2.36739e-42	8.0778e-42
SLAIN1	1.56533	3.04993	1.4846	9.97472e-40	2.87943e-39
ZMAT1	3.63681	0.752025	-2.88478	2.7984e-48	4.59288e-47
RPS17P2	0.0794906	1.21069	1.1312	5.75681e-47	3.79814e-46
XRCC2	0.281568	1.67903	1.39746	3.76069e-48	4.95607e-47
FP236383.2	8.08179	2.07585	-6.00593	2.62367e-48	4.59288e-47
FAM111B	0.159043	1.73531	1.57626	3.48113e-48	4.78118e-47
MAGT1	3.0797	4.73907	1.65938	2.46385e-47	1.85564e-46
AC093010.3	4.4633	2.9414	-1.5219	1.60929e-38	4.38983e-38
SDF2L1	2.82723	4.48734	1.66012	6.24966e-38	1.6597e-37
RPS26P8	0.2433	1.79322	1.54992	8.27203e-45	3.5625e-44
NPC1	3.64337	2.16056	-1.48281	1.42811e-45	6.89182e-45
ATG12	3.8631	2.36085	-1.50225	5.31814e-48	5.95586e-47
TNRC6A	4.10448	2.59702	-1.50746	6.69807e-48	6.86399e-47
MTND4P12	0.342758	3.74235	3.39959	3.96752e-47	2.76803e-46
FTX	1.82722	0.620615	-1.20661	6.69807e-48	6.86399e-47
COL4A6	2.40162	0.40168	-1.99994	1.18766e-46	7.1828e-46
FAM117B	1.55011	2.62239	1.07228	3.90908e-41	1.22931e-40
INHA	5.20097	1.38382	-3.81715	1.91044e-43	7.13018e-43
MSX1	1.21303	2.72683	1.5138	8.01761e-18	1.20187e-17
CAB39L	3.13304	1.74313	-1.38991	1.19469e-38	3.28055e-38
PI4KA	4.52323	2.86229	-1.66094	5.80125e-46	3.00143e-45
PRAME	1.45458	4.56476	3.11019	1.46841e-38	4.01677e-38
RAB25	0.576835	5.04014	4.46331	3.2801e-44	1.31964e-43
TRBV5-4	0.0536261	1.20175	1.14812	2.1697e-42	7.42099e-42
CYP51A1	3.61213	0.891791	-2.72033	2.05471e-48	4.59288e-47
AL691482.3	0.12305	1.78707	1.66402	3.97079e-44	1.5821e-43
CD81	7.9854	6.8279	-1.1575	1.8308e-36	4.54679e-36
PAFAH2	1.5162	2.76786	1.25167	1.60803e-46	9.45729e-46
GOLPH3	4.22127	5.77918	1.55791	3.66483e-48	4.89224e-47
HMBOX1	3.40977	1.61845	-1.79132	4.67794e-48	5.55348e-47
LINC00894	3.14066	0.679657	-2.461	6.6129e-48	6.81048e-47
RNASEH2A	2.38505	4.6045	2.21945	4.92426e-48	5.73591e-47
LEMD1	0.640646	3.0886	2.44795	3.10525e-40	9.23373e-40
ABLIM1	5.90962	4.30807	-1.60155	4.69409e-35	1.09991e-34
RRM2	0.385147	3.45396	3.06881	3.39328e-48	4.76557e-47
DDHD1	2.01761	0.867446	-1.15016	4.09769e-47	2.85028e-46
AC021146.12	0.0344807	1.47515	1.44066	2.37222e-45	1.10377e-44
SNHG7	5.44364	3.55168	-1.89196	3.45185e-41	1.08772e-40
LINC01003	1.37155	2.82338	1.45183	7.26168e-43	2.5816e-42
MOB2	4.07378	2.56577	-1.50801	5.14936e-47	3.44898e-46
CYP21A1P	1.61247	0.577675	-1.0348	2.13992e-29	4.1872e-29
EIF4EBP2	3.72225	4.89456	1.17231	2.80109e-42	9.51222e-42
AGBL5	2.99552	4.04646	1.05093	1.76357e-38	4.79801e-38
CCDC159	5.06297	2.11235	-2.95062	2.27771e-48	4.59288e-47
C12orf75	2.0765	3.63367	1.55718	1.85837e-26	3.37075e-26
CRABP1	0.274497	4.92608	4.65158	2.02009e-44	8.34027e-44
SREK1	4.40402	1.98609	-2.41793	2.05464e-48	4.59288e-47
MST1	3.55495	1.82084	-1.73412	1.3337e-36	3.33004e-36
CCL21	3.17005	1.82092	-1.34913	2.07373e-11	2.73363e-11
FAM207A	2.6331	3.94167	1.30857	1.51547e-43	5.69744e-43
DNAJB13	0.319193	1.72605	1.40686	1.59372e-36	3.96765e-36
CDC42EP5	2.82374	4.17129	1.34755	5.42375e-20	8.49143e-20
ATP6AP1L	2.13642	0.742556	-1.39386	1.50974e-46	8.9273e-46
VSTM2L	0.225286	2.15221	1.92693	5.22418e-36	1.27204e-35
AC080013.6	0.428453	2.09893	1.67047	4.73548e-44	1.86954e-43
SDSL	1.67837	3.02757	1.3492	1.05308e-38	2.89729e-38
LYRM9	3.55214	0.836756	-2.71539	2.36737e-48	4.59288e-47
CD109	0.540867	2.23844	1.69758	1.76874e-40	5.33811e-40
ZNF419	2.26117	1.07642	-1.18475	1.18764e-46	7.1828e-46
PLBD1	1.70097	3.25801	1.55704	2.9036e-35	6.86511e-35
RAB6A	4.25565	5.39076	1.1351	8.1945e-43	2.89826e-42
CLDN3	0.290612	9.16229	8.87168	2.04833e-48	4.59288e-47
SARS2	3.53789	1.79198	-1.74591	9.13698e-43	3.21755e-42
CHST3	3.18321	1.99124	-1.19197	2.20798e-31	4.56258e-31
SMARCA1	4.32353	3.18307	-1.14046	2.76851e-31	5.70688e-31
MTCYBP18	0.133018	1.34089	1.20787	3.81551e-46	2.04821e-45
MLXIP	4.55792	3.18424	-1.37368	2.72771e-44	1.10555e-43
CDT1	0.470213	3.47115	3.00094	2.1083e-48	4.59288e-47
GSTT2B	3.30237	1.50281	-1.79955	1.53795e-35	3.67081e-35
MAG	4.72865	1.37168	-3.35697	6.88118e-42	2.272e-41
ECHDC2	7.62938	2.49615	-5.13323	2.0546e-48	4.59288e-47
GLT8D1	4.95431	3.83557	-1.11874	1.04495e-45	5.14438e-45
CFD	4.13503	3.00654	-1.12849	9.4247e-12	1.25046e-11
PIK3R2	3.49736	0.662425	-2.83493	2.05473e-48	4.59288e-47
EGR2	0.924815	1.99248	1.06766	1.61881e-21	2.62419e-21
NDUFB4P11	0.343845	1.89217	1.54832	2.0939e-36	5.18908e-36
CDKN1C	6.34676	4.06352	-2.28324	1.53611e-40	4.65949e-40
AGPAT5	1.9126	2.96029	1.04768	1.14014e-39	3.28312e-39
FEZ1	3.29909	0.816986	-2.4821	2.59054e-48	4.59288e-47
SPR	2.43734	4.45574	2.0184	4.89684e-45	2.16566e-44
PLEKHF2	1.57152	3.56589	1.99437	9.34256e-48	8.61876e-47
ACD	4.22167	3.11196	-1.10971	2.96654e-39	8.3762e-39
TRAPPC1	5.10432	6.67645	1.57213	8.11161e-48	7.80921e-47
DMAP1	4.2482	3.24443	-1.00376	5.66388e-44	2.21769e-43
AQP9	0.323497	1.85453	1.53103	4.61816e-35	1.08266e-34
SLC30A6	2.00862	3.54459	1.53597	2.1356e-48	4.59288e-47
HNRNPA1L2	2.19684	1.05757	-1.13927	2.98211e-47	2.16847e-46
SF3B2	6.20917	4.68837	-1.52081	2.81594e-48	4.61154e-47
MUS81	4.96762	3.208	-1.75962	2.27751e-48	4.59288e-47
SLC25A3P1	0.0313157	1.60528	1.57396	4.5e-42	1.50451e-41
NFKBIZ	3.49483	2.02517	-1.46966	2.81151e-31	5.79359e-31
ARMH1	2.68541	0.926012	-1.7594	3.3227e-43	1.21904e-42
ZNF780B	2.26927	1.26443	-1.00484	5.90484e-38	1.56992e-37
AL354710.1	0.0794196	1.65517	1.57575	2.4509e-46	1.37569e-45
AC136475.1	1.88965	0.624489	-1.26516	1.56705e-41	5.05895e-41
RAB10	3.74987	5.72622	1.97635	4.92758e-46	2.58141e-45
INAVA	0.267945	3.54222	3.27427	3.17799e-47	2.29212e-46
CSTA	3.21275	1.94695	-1.26581	6.93684e-24	1.18303e-23
SYT17	0.45339	1.88838	1.43499	8.13409e-42	2.67238e-41
YARS2	2.36433	3.82851	1.46417	7.91081e-48	7.67522e-47
ANPEP	0.923554	3.03039	2.10683	1.9768e-34	4.5247e-34
CLDN4	0.613593	6.77764	6.16405	1.70238e-47	1.37311e-46
N4BP2L2-IT2	1.60449	0.32098	-1.28351	3.06196e-48	4.67701e-47
DHCR24	3.32011	7.27617	3.95606	2.19525e-45	1.02683e-44
DDX19B	3.17972	1.94126	-1.23846	7.53185e-47	4.8121e-46
POLR2J	4.74391	5.86393	1.12002	2.27598e-40	6.82132e-40
CEP126	2.20351	0.55165	-1.65186	1.09859e-45	5.38258e-45
GPSM3	1.80418	3.77698	1.97279	2.80505e-41	8.89339e-41
SCRIB	4.01351	5.51101	1.4975	1.83493e-39	5.22871e-39
NCBP3	3.74845	1.95297	-1.79548	8.65218e-48	8.18096e-47
PAGR1	6.02546	2.65229	-3.37317	2.30709e-48	4.59288e-47
D2HGDH	4.26843	2.6825	-1.58593	5.16369e-42	1.72083e-41
BCL3	3.95085	5.16437	1.21353	2.96101e-17	4.38837e-17
NDC1	1.44434	3.74645	2.30211	2.05465e-48	4.59288e-47
PABPC1L	4.53729	3.30329	-1.234	2.66861e-26	4.81921e-26
PABPN1	6.30632	4.76061	-1.5457	1.05807e-45	5.20231e-45
C11orf58	5.90219	3.99377	-1.90842	2.13559e-48	4.59288e-47
RENBP	1.12339	2.29305	1.16966	3.84369e-29	7.46128e-29
IFT80	3.27253	1.95753	-1.315	2.79954e-46	1.54711e-45
TMEM98	6.07548	3.82782	-2.24767	3.17015e-45	1.44573e-44
EPB41L4A-AS1	6.37813	2.92422	-3.45391	8.01271e-48	7.74193e-47
RAB11FIP1P1	2.04877	0.668057	-1.38071	7.43721e-47	4.76149e-46
WDR77	2.8184	4.35125	1.53285	4.89658e-45	2.16566e-44
MTHFR	3.12246	1.97364	-1.14882	7.41526e-35	1.72469e-34
RN7SL138P	0.216888	1.25327	1.03638	3.85964e-38	1.03401e-37
ZDHHC8P1	4.62105	1.5203	-3.10076	2.92869e-40	8.71989e-40
IDS	4.5942	3.5368	-1.0574	2.1695e-37	5.59743e-37
MEG9	2.89097	0.199179	-2.69179	1.2324e-47	1.06201e-46
AC138932.1	3.71401	0.692554	-3.02145	3.39354e-48	4.76557e-47
SLC34A2	0.232483	7.21101	6.97853	2.24727e-48	4.59288e-47
TTBK2	1.81841	0.733429	-1.08498	5.89233e-48	6.34654e-47
MAML2	1.58714	3.02315	1.43601	3.90912e-41	1.22931e-40
NDP	2.89139	1.81078	-1.08061	5.02061e-14	6.99077e-14
DOCK5	2.29481	1.05208	-1.24273	8.42691e-41	2.59815e-40
HSF4	5.5788	1.48466	-4.09414	2.30721e-48	4.59288e-47
CCR1	0.646124	2.30463	1.6585	7.32641e-38	1.93872e-37
KHDC4	4.74354	3.73488	-1.00867	7.9954e-40	2.3186e-39
CCDC184	1.94994	0.939898	-1.01004	3.07542e-29	5.98683e-29
PPP1R14C	0.251992	2.4941	2.24211	1.31227e-42	4.56396e-42
LNX2	1.18065	2.37839	1.19774	1.61798e-45	7.71969e-45
FGF2	2.08039	0.371709	-1.70868	2.65957e-47	1.97412e-46
SORBS3	6.25484	3.93216	-2.32267	4.16746e-48	5.22132e-47
AL138785.1	0.0487214	2.57708	2.52835	1.29096e-48	4.59288e-47
NTF3	2.43032	1.24442	-1.18591	1.32159e-21	2.1482e-21
ELF4	2.58975	4.48744	1.89769	2.50275e-45	1.16101e-44
ELP2	5.23965	2.75012	-2.48953	1.11735e-47	9.85297e-47
PKM	6.65886	7.91495	1.25609	2.28133e-42	7.79276e-42
UQCRHL	1.37278	2.95146	1.57868	1.16497e-29	2.29694e-29
FADS3	4.82579	3.1167	-1.70908	1.23157e-43	4.67455e-43
ARMC7	1.76877	3.11494	1.34617	3.09826e-47	2.24328e-46
AC034231.1	0.545141	1.73971	1.19456	4.72708e-38	1.26257e-37
ENPP5	1.60647	3.08806	1.48159	4.01066e-43	1.46077e-42
STAMBPL1	2.61851	0.592079	-2.02643	3.43736e-48	4.78118e-47
ARHGEF7	4.16797	2.27697	-1.89099	2.21974e-48	4.59288e-47
CD48	0.698115	1.99963	1.30151	1.09864e-28	2.10539e-28
GZMA	0.57737	2.03355	1.45618	1.59703e-27	2.96771e-27
FUCA1	3.08924	4.75778	1.66854	3.39326e-48	4.76557e-47
ADCY5	2.91077	1.56121	-1.34955	1.10201e-33	2.4576e-33
NCAPG2	1.33944	2.42761	1.08817	2.86082e-40	8.52352e-40
ZNF467	2.18427	4.5517	2.36742	2.09555e-46	1.19869e-45
MRPS18A	3.33177	4.92468	1.59292	6.04467e-48	6.45455e-47
CLDN5	3.52911	1.56099	-1.96812	2.08186e-36	5.16e-36
MIPOL1	1.79907	0.317505	-1.48157	2.05477e-48	4.59288e-47
TMC4	1.0886	5.48727	4.39866	2.46042e-48	4.59288e-47
RAB11FIP4	0.973536	2.38354	1.41	3.60442e-42	1.21272e-41
ZEB2	4.19004	0.90325	-3.28679	2.27765e-48	4.59288e-47
APBB1	4.93033	2.25866	-2.67167	2.19134e-48	4.59288e-47
SLC37A3	3.86648	2.34251	-1.52397	3.39345e-48	4.76557e-47
AC139256.2	4.16646	0.519433	-3.64703	2.05469e-48	4.59288e-47
RPL7AP50	0.729176	2.62844	1.89926	4.31129e-47	2.97879e-46
NECTIN1	1.19556	2.62996	1.4344	1.1658e-37	3.04718e-37
LRRC49	2.64285	0.811259	-1.83159	3.18233e-48	4.70737e-47
PCDHGB6	1.78137	0.575857	-1.20552	7.00292e-43	2.49343e-42
PDK2	4.58481	3.08849	-1.49631	2.55248e-39	7.22244e-39
IGLV1-51	1.35245	3.58891	2.23646	2.01779e-18	3.0606e-18
PLPP3	5.04336	3.54729	-1.49607	2.42788e-30	4.87438e-30
POLR2L	5.04358	6.89358	1.85	6.7186e-47	4.35347e-46
FBLN2	1.35465	2.92071	1.56606	1.12515e-21	1.8313e-21
AC008267.3	0.115668	1.16051	1.04484	2.26395e-47	1.72668e-46
PROCA1	2.2784	0.771732	-1.50667	1.50995e-44	6.30555e-44
NMNAT3	3.20881	2.07028	-1.13854	2.99968e-38	8.08751e-38
EIF2B4	4.40724	3.12002	-1.28722	6.2822e-48	6.60583e-47
ITGA3	3.46571	4.71772	1.25201	3.09071e-29	6.01596e-29
SRD5A3	1.39007	3.75157	2.3615	8.33484e-47	5.25113e-46
RNU7-40P	0	3.44298	3.44298	1.71883e-48	4.59288e-47
ARHGEF4	3.14473	1.19405	-1.95068	5.65759e-46	2.9353e-45
SAMD12	0.438333	1.85659	1.41826	1.47209e-46	8.73244e-46
ZNF410	4.16819	0.524634	-3.64356	2.05476e-48	4.59288e-47
S100A2	0.967512	3.71433	2.74682	1.19995e-40	3.66676e-40
TRIM38	1.61473	2.96353	1.3488	2.12859e-45	9.97428e-45
ZNF883	0.763719	1.90094	1.13722	6.81729e-29	1.31538e-28
TK1	0.733315	5.36683	4.63351	2.08117e-48	4.59288e-47
SP100	4.67332	2.78741	-1.88591	5.59779e-48	6.13978e-47
SLC9B2	2.26824	0.933257	-1.33498	1.72211e-45	8.17879e-45
IGHV4-31	0.22042	2.04572	1.8253	1.42081e-24	2.46174e-24
ZBTB16	3.76053	0.458459	-3.30207	8.49434e-47	5.34427e-46
GUK1	6.86443	5.80776	-1.05667	1.92688e-37	4.98391e-37
AC027559.1	2.46445	0.390764	-2.07368	6.51705e-48	6.75003e-47
DDX5	7.56301	5.73311	-1.82991	6.04305e-48	6.45455e-47
HSPB2	2.31781	0.934868	-1.38294	5.77593e-41	1.79931e-40
VWA7	0.638236	1.65293	1.01469	2.58025e-32	5.49187e-32
PPP4R1L	2.60364	0.749162	-1.85448	2.16338e-48	4.59288e-47
CLK1	6.91859	3.58134	-3.33726	2.05465e-48	4.59288e-47
MSI1	0.861989	3.13939	2.2774	1.73527e-35	4.13594e-35
CKMT1B	0.267617	1.30004	1.03243	2.26117e-30	4.54508e-30
EMX2	2.6151	5.4391	2.824	3.64101e-38	9.77406e-38
NMB	2.0317	3.54512	1.51342	3.1796e-39	8.95192e-39
MTCO1P40	0.221634	3.8992	3.67757	2.92761e-47	2.13553e-46
USP47	4.08764	2.15923	-1.92841	2.1356e-48	4.59288e-47
SYNPO2	3.77829	0.986604	-2.79169	2.73004e-46	1.51362e-45
PSMD10	3.52061	4.57098	1.05037	1.00437e-44	4.28501e-44
ACSF3	3.08805	1.56236	-1.52569	2.55736e-48	4.59288e-47
NCAPD2	2.33041	4.84975	2.51934	2.19133e-48	4.59288e-47
CASP9	4.57231	2.19768	-2.37463	3.8822e-46	2.0816e-45
SLC31A2	1.67222	0.405623	-1.26659	8.76776e-47	5.49954e-46
PGM2L1	0.640635	1.85572	1.21508	1.43518e-38	3.92698e-38
PTOV1-AS2	3.99611	1.92124	-2.07487	2.62589e-47	1.95463e-46
CDK5	1.46424	3.31661	1.85236	8.65229e-48	8.18096e-47
NACA	9.27187	5.92296	-3.3489	2.05307e-48	4.59288e-47
ACSF2	4.51878	2.98703	-1.53175	5.97459e-40	1.74756e-39
RTN3	4.31634	5.62644	1.3101	1.21014e-46	7.30798e-46
RNU6-4P	0.0429691	1.23018	1.18721	4.28862e-43	1.56018e-42
LDLRAD1	0.0679303	1.66404	1.59611	1.9153e-43	7.14687e-43
ANKRD65	2.11131	4.35846	2.24715	7.49435e-38	1.98062e-37
MRPL53	4.90155	2.23736	-2.66418	2.1356e-48	4.59288e-47
KATNBL1	3.40546	2.10088	-1.30457	1.43536e-46	8.52577e-46
RPL5P34	1.40008	3.43367	2.03359	6.52869e-48	6.75003e-47
PMS2P1	1.60154	3.96538	2.36385	2.05462e-48	4.59288e-47
SRSF4	5.64971	4.63834	-1.01137	8.18868e-45	3.53151e-44
RGL3	2.10666	3.59876	1.49209	2.20125e-26	3.98296e-26
UIMC1	4.20986	2.3695	-1.84036	2.05464e-48	4.59288e-47
SNORD101	0	1.59456	1.59456	2.92026e-45	1.33931e-44
MAFB	1.81247	4.23823	2.42577	5.7691e-44	2.25508e-43
UQCRFS1P1	0.836757	2.36915	1.53239	9.11082e-42	2.98431e-41
ABCC10	3.5425	2.28379	-1.25871	9.05661e-42	2.96707e-41
[truncated: 5,256 more rows]
